# Supplementary material
Source: PubMed Central journal article supplement (PMC5857995)
Supplement: 10.1074_M117.812818_jbc.M117.812818-1.pdf [file 10.1074_M117.812818_jbc.M117.812818-1.pdf]

## Supplemental Materials

### **The long non-coding RNA Gm10768 activates hepatic gluconeogenesis by sequestering microRNA-214 in mice**

**Xianwei Cui<sup>1,2</sup>, Jingmin Tan<sup>1</sup>, Yujie Shi<sup>1</sup>, Chen Sun<sup>1</sup>, Yun Li<sup>2</sup>, Chenbo Ji<sup>2</sup>, Jun Wu<sup>3</sup>,  
Zhao Zhang<sup>1</sup>, Siyu Chen<sup>4,\*</sup>, Xirong Guo<sup>2,\*</sup>, Chang Liu<sup>1,4,\*</sup>**

<sup>1</sup>Jiangsu Key Laboratory for Molecular and Medical Biotechnology and College of Life Sciences, Nanjing Normal University, Nanjing, Jiangsu 210023, China.

<sup>2</sup>Nanjing Maternal and Child Health Medical Institute, Nanjing Maternal and Child Health Hospital, Obstetrics and Gynecology Hospital Affiliated to Nanjing Medical University, Nanjing, Jiangsu 210004, China.

<sup>3</sup>Department of Geriatric Cardiology, the First Affiliated Hospital of Nanjing Medical University, Nanjing, Jiangsu 210029, China.

<sup>4</sup>School of Life Science and Technology, China Pharmaceutical University, Nanjing, Jiangsu 211198, China.

## Supplemental Experimental Procedures

### High-throughput RNA sequencing

Total RNA isolated from pooled liver samples dissected from three mice subjected to *ad libitum* feeding, 16-h fasting, or 16-h fasting followed by 8-h re-feeding, was used for the construction of RNA-seq libraries. Quality of RNA libraries was evaluated using the Agilent 2200 TapeStation (Agilent Technologies, USA). Library sequencing was performed on HiSeq 3000 sequencing platform (Illumina Company, USA) by Guangzhou RiboBio Co. (China). All sequenced reads were trimmed for adaptor sequence, were masked for low-complexity or low-quality sequence, and then were mapped to reference genome GRCm38 (mm10) using Tophat (Version 2.0.13), allowing only unique alignments (read-mismatches = 2, read-gap-length = 2). Fragments Per Kilobase of transcript per Million mapped reads (FPKM) were calculated for additional statistics. We defined transcripts as lncRNAs according to the following criteria: (1) length > 200 bp, (2) expression > 2 FPKM, (3) ORF < 300 bp, (4) no splicing or overlap with any coding gene present in RefSeq, UCSC, or Ensembl annotations, (5) low protein-coding potential (Pfam analysis: <http://xfam.org/>, and PhyloCSF analysis).

### *In vitro* translation assay

*In vitro* translation assay was carried out using a prokaryotic expression system. Briefly, the full-length of Gm10768 was subcloned into a pET-28a vector using HindIII and BamHI enzymatic cutting sites. This recombinant plasmid (pET28a-Gm10768) and Nus-tag encoding control plasmid were transformed into competent BL21 (DE3) cells (Novagen, USA). The bacterial lysates were identified by SDS-PAGE and detected by coomassie brilliant blue R-250 staining.

### FISH

FISH analysis was performed to determine the expression and localization of Gm10768 in mouse primary hepatocytes. snRNA U6 was selected as a positive control for FISH. Probes were synthesized by RiboBio (Guangzhou, China) and a fluorescent *in situ* hybridization kit (RiboBio) was used following the manufacturer's instruction. In brief, cells treated with or without 10  $\mu$ M FSK for 6 h (Sigma, MO, USA) were rinsed in PBS and fixed in 4% formaldehyde for 10 min. Then the cells were permeabilized in PBS containing 0.5% Triton X-100, washed with PBS 3 times for 5 min, and then prehybridized at 37 °C for 30 min before hybridization. Hybridization was carried out using probes labeled with Cy3 (red) in a moist chamber at 4 °C overnight. Cells were counterstained with DAPI (blue) and imaged using a confocal laser-scanning microscope (Carl Zeiss, Heidelberg, Germany).

### Bioinformatics analyses

Two widely used online tools, Coding Potential Calculator (CPC) ([http://cpc.cbi.pku.edu.cn/programs/run\\_cpc.jsp](http://cpc.cbi.pku.edu.cn/programs/run_cpc.jsp)) and Coding Potential Assessment Tool (CPAT) (<http://lilab.research.bcm.edu/cpat/index.php>), were used to assess the protein coding potential of Gm10768 (1,2). For CPC, transcripts with scores more than 1 are classified as "coding", less than -1 as "non-coding", and scores between -1 and 1 are marked as "weak non-coding" ([-1, 0]) or "weak coding" ([0, 1]), respectively (3). The coding potential score of

Gm10768 calculated by CPC was 0.17, which was classified as weak coding. For CPAT, the cutoff of coding probability in mouse is 0.44, so transcripts with scores higher than 0.44 are classified as "coding" and less than 0.44 defined as "non-coding" (4). The coding potential score of Gm10768 calculated by CPAT was 0.014, also indicating that it is a non-coding transcript.

## Supplemental Figure 1

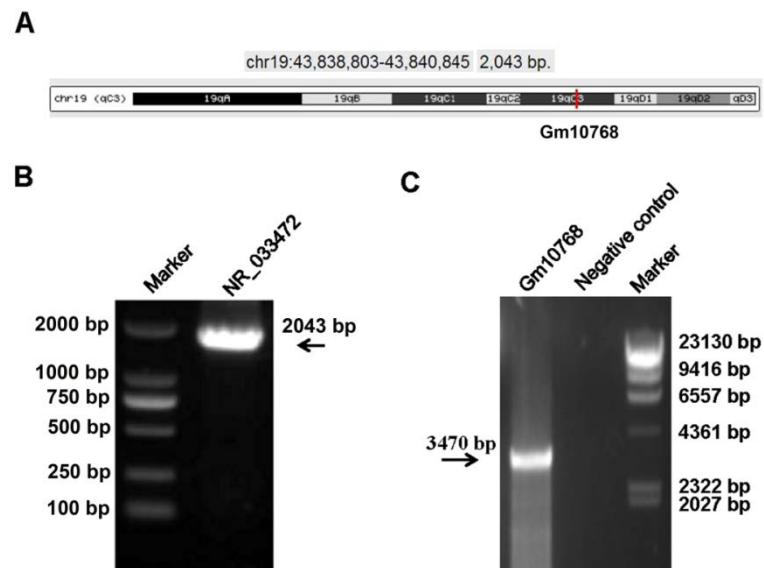

**Supplemental Figure 1. The full-length of Gm10768 analyzed by RACE.** (A) Chromosome location of Gm10768 cDNA clone (NR\_033472) in the mouse genome. (B) PCR amplification of the predicted fragment cDNA clone of Gm10768. (C) PCR amplification of the full-length Gm10768 by using RACE method.

## Supplemental Figure 2

Gm10768

5' RACE (1009 bp)

TGGGGAGATA GCTCGGTTGT TAGGGTGGCTT GCCTTGAAAG CGTGAGGGTC CGATTTGATC  
 CCTAGAAACC CCTATTACG ATTTTTTTTA AAGTACGGGC ATAGTTGTCC ATGATAACAG  
 TTTGAGTGTT GGACAGCCAG AGGTAGTCAG GTCTGGGGC TCACGTAGCCA GGCAGCAAG  
 CTAGCCTGCT TGGAAAATCC CAGATCAGGA AGAGACCGTG TCTCAAAAA ACAAAAAAAC  
 AACAGCAAAA CCCCTAGGTG GACAGAGCGA AAGGCTCAAC ACCGACAAC ATCTGCTATC  
 ACACCTCAAA ATGGAAAGCCT CGTTGGCTTG CCTTGATCAT AAGTTCTTGC TACCCCAACA  
 TTCCGAGAAA TAACCGCTAT TCTTAAGTTT CACAGTTCTT TTGCGTGTG TTTTAGTSTT  
 TACTGCTCTT GTATGCTCAG GCCATATATG CTGTTTTATC TGATGTAAAT GGACTCAJAC  
 AGCTTGCGTC CTGTGGTAC ACCTTTGTTA AGAATACATT TGCAGTTTTG CTACACTGAT  
 GCGCGTGGCA GGGTTCATCT TCTCTCTCTC TCTCTCTCTC TCTCTCTCTC TCTCTCTCTC  
 TCTCTCTCTC TCTCTCTCTC TCTCTCTCTC AGTAGCACAG CACTGTGCAA ACAGATCATA  
 CTTTCGCTAC TGACAGAGGT GACTGAGCAC TGGGCTCTTC CTCTATACC AACTTCAJTG  
 CTATGAAACAT CCTGGGATAC TGGCTTGTG TCTATAGTTT GGAATGGGG GGTGTCAAAT  
 CTTTACATGT ATATCCTGAG CAGCTCCAGT TTAACAGTG AGTATACTA AGATCTTATP  
 TTGGGTTCAC TGTGGACATC CTCAGTTTCT TAGGAGGGTC AGTATCTATT TGTGAGTTC  
 TGGTACATTT GAGTGTATTA CAGTTTTAAA AATGTTTTAT ATCTCACAGT TFGAGCATCT  
 GGAATTTTTT TCTCATCCAT TGGCTTTTTA ATGTTAATTT TTACTCATT

3' RACE (418 bp)

GTCCCTAAAT GTCACTGAAA GATCTTGCCA GAATGTAAAA GGACACAGAA GCGCTGAAAT  
 TGCCAGATA GAGTCTAGCG TTAGCAGAAC TAGCTTCACT GATTTAGAAA AATAGAGGTG  
 CACAGTGTCT TGGCCACTCC TTGAACCTGT GTGTCTGCCA ATGTTGGGAC CTGGTGTGTG  
 CTCTTGCTG CACCTTCATT AGACTCTTTC CTTGTACACC TCCCTACCC ATTTCTTGAG  
 AATAGACATT GTTAGATCT GGAATCCCC TAATCTCCCC CTTCCTCTTT CCCCCCTGAG  
 GGCCTATAA AACTGGGAC TCTTTCCOCT GAGGTCGAC TCCTCTAACC CTGGSTGGGA  
 TATGAGTCTGT CCCCAGAGCT CTGGCTTTCC CGAATAAAG CCTCATGTGG TTTGCAAC

NR\_033472 (2043 bp)

GATTTATTTT ATAATTTTTA ATTTTAATAA TTGAGTTAAT TTTAATTTTT AAGAAGATTT  
 ATTTTATTTCT ATGAAATGTT TACCTGCACG CACATATGTC TATCATATGC TCAGAAATCA  
 GAAGAGGGCT TTAGATCCCC CTGAACTGG AGTTACAGGC AGTTGTGAGC CACCTTGTGG  
 GTCTGGAAAT TGAACCTGAG CCTCTGCAA GAACAAGTGC TCTTAACCTT GGTGGCAATTT  
 CTCAGCCCCC CTCATGTATT ATTGTGATGT CATATTTCTT TGTATGATAT CTCAGCTTTT  
 ACTGTGAGCT TTTTACTTCC CTTACAACTC GATCTGAGAC TGTCTCTTGA GGTGGAGAT  
 AAACCCAAAT TGCTCTAAG AGAAATGTG AAGGCTTCTG CCAACAACCT GGTATATCAC  
 CCAGGCGCTCT TGGGACTAAA CTCCTCACTA AGAGTCCAAA GCAGGCGGTT CAGGCAGCTT  
 CAGGGCACAA TCATAAAGA CCTGTGTTG GACTTACAAG TCTCAGGGAG AGTCCCACT  
 TAAATAGGTA GCATGGACA TGGTTTTTG TGGCTGTGGT TAACATCTGA ATCTATGTT  
 CCTCATTAC CTGGCCATTT CAAAAGTAGC CTTTCAAGAC TCAGGGTTAT CAAAGAGGTC  
 TGTAAGAGTT TGTATTCTTT GGCCTTCTCC TACTGTGCTT CTTATATAT TACAGAGGTT  
 AGATTTTTAA GCTCTCAGGG TTTGGAAACC TGCCTGCTTT TGCCTCAACC TCACAGCTCC  
 TCTTTTGGAT TGTCTGAGG GGTCACTGCA GTCTTCLATT TGAGGCTGTA ATCTATGAGA  
 CTTGAATCTA TCCAGCATT CGTATTTAGT GAGGTTCTCA GAGGAGAGA GTATAGCTAA  
 GTIAGGCTAC CCTCTCTCC TTGCGCTGGC GGTGACCAAT TGCATTTGTT ATCCAAATCG  
 TAACTCCCC CCCCCACCC ACCCCCAAAA GTTGTCCGAA TTAGATAACA GTGTTCCAT  
 TTCCAGCTCC GGAACGTTGG CCAACAGAG TATATAGGTA TTAACCTGTT GCCTTAAGSA  
 AGACCTTCCC TTCCCTGACT CTGAGATGG GATACATPTE AATATGTTCA CAATAGTGG  
 CCAATTTTCA AAGCTAGCTT TTGAAATGCT ACCAAGGTAT AATTCGAAAT TACGAGATAT  
 GAATCTAACA CTCTATAGTT TGAATAAAG CCCATTGTCC TACATCTGG GAAGAACA  
 TTAACATGG CATCTCTTC ATGAGGTACC TCCCATTTTT TGTAGCAGGG GAGGACATTT  
 GAAGATTGAT TCAACAGATC CTGTACTTCC AACGCTCTGT CAGAATATG TTTGTGGTTT  
 AACTGTGCTA CTGAGGTTTG CTCTTTTTCT TGTCCCCCT CCTCGCCAA TCTTGGTTG  
 TCCCCTTCTC TGCCATCAGC ATGCTTTTACC CCTCTTCTC AGCCCAATTT CTCTTTGACT  
 TCTGATATAT CAGTTAAGTA ATAGATTTT CTTGTTCTAT ACTTTAAAAA AAGAAGAAA  
 CAAAAACCAC CTTATTTTCT TCTCAAGTAC ATTTCAAATC CTTACATCC TCTAGTTTGC  
 TTCTTAAAC GGTTTTCTAG ATACACAACA TTTGAGAAC CAGAAGAAC TTTGAAACC  
 AGAGGAGCAG TTTACATCTA CTGAGCCCTC ACTGCCAAC CAGAGCTGTG CACTGGAATA  
 AAGCATCAAG GAGGAAGGAG GAGGCCCTAC CCACCTCCCA TTTACATCCC AACTAATCA  
 GCCCAGGCTG GTCTTTGTAT TATATCACT AGAGAACTTA GATTTACAGC CAGTTCTATT  
 TATCTATTTA TCTATTAAT GTCTAACCC TAAAAAAGTCA TTTAATGTAA ATAAAACTAT  
 TTATTTAAAT AAACATCCAA TTCCGTTGGG TTGTGAGTTA ATCTCCOCT CAGGAAGTTC  
 TTAGTTTAC AAAATCAATTT CTGGGACTAT TTTAGATAAG TATGGAGGAC TAGAAAATCCC  
 TAT

Supplemental Figure 2. Nucleotide sequences of full-length Gm10768.

### Supplemental Figure 3

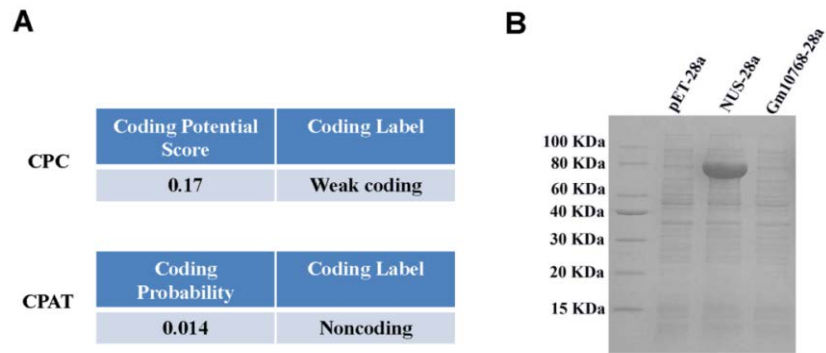

**Supplemental Figure 3. Analysis of the protein coding potentiality of Gm10768.** (A) Evaluation of the protein coding potential of Gm10768 by using online tools. (B) *In vitro* transcription and translation assay of Gm10768.

## Supplemental Figure 4

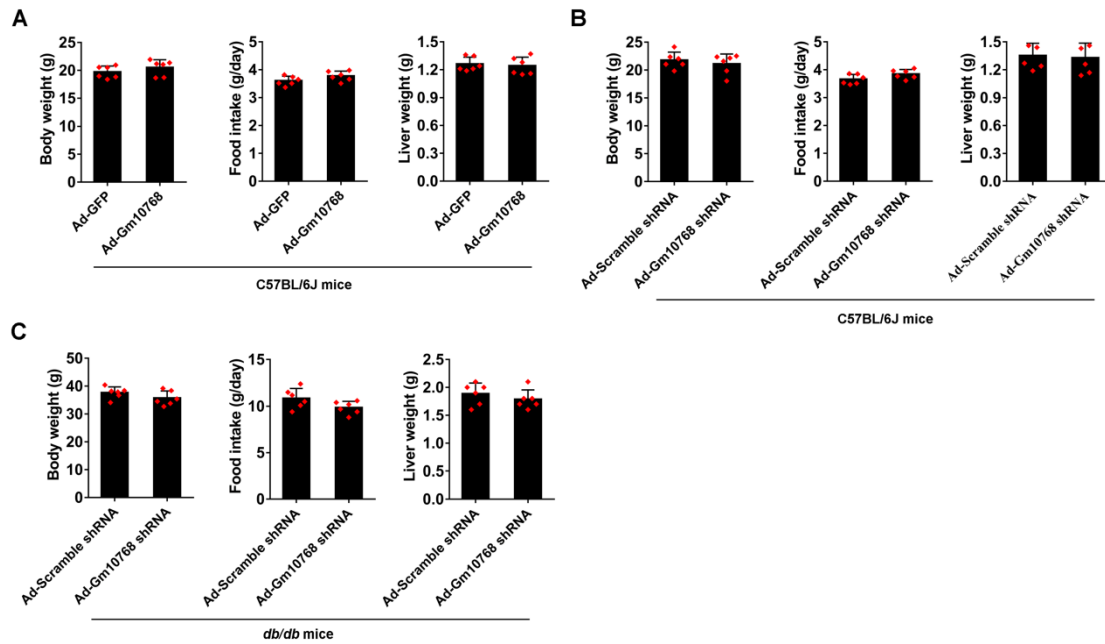

**Supplemental Figure 4. A modest effect of Gm10768 on the mouse body weight, food intake and liver weight.** (A) C57BL/6J mice were transduced with adenoviruses encoding GFP or Gm10768 through tail-vein injection ( $1 \times 10^9$  PFU per mouse) for four days ( $n=6$  per group). (B, C) C57BL/6J mice (B) or *db/db* mice (C) were transduced with adenoviruses encoding Scramble shRNA or shRNA against Gm10768 through tail-vein injection ( $1 \times 10^9$  PFU per mouse) for four days ( $n=6$  per group). At the end of experiments, the mouse body weight, food intake, and liver weight were monitored. Data were performed as mean  $\pm$  SD. Error bars represent the SD from the mean of three independent experiments.

## Supplemental Figure 5

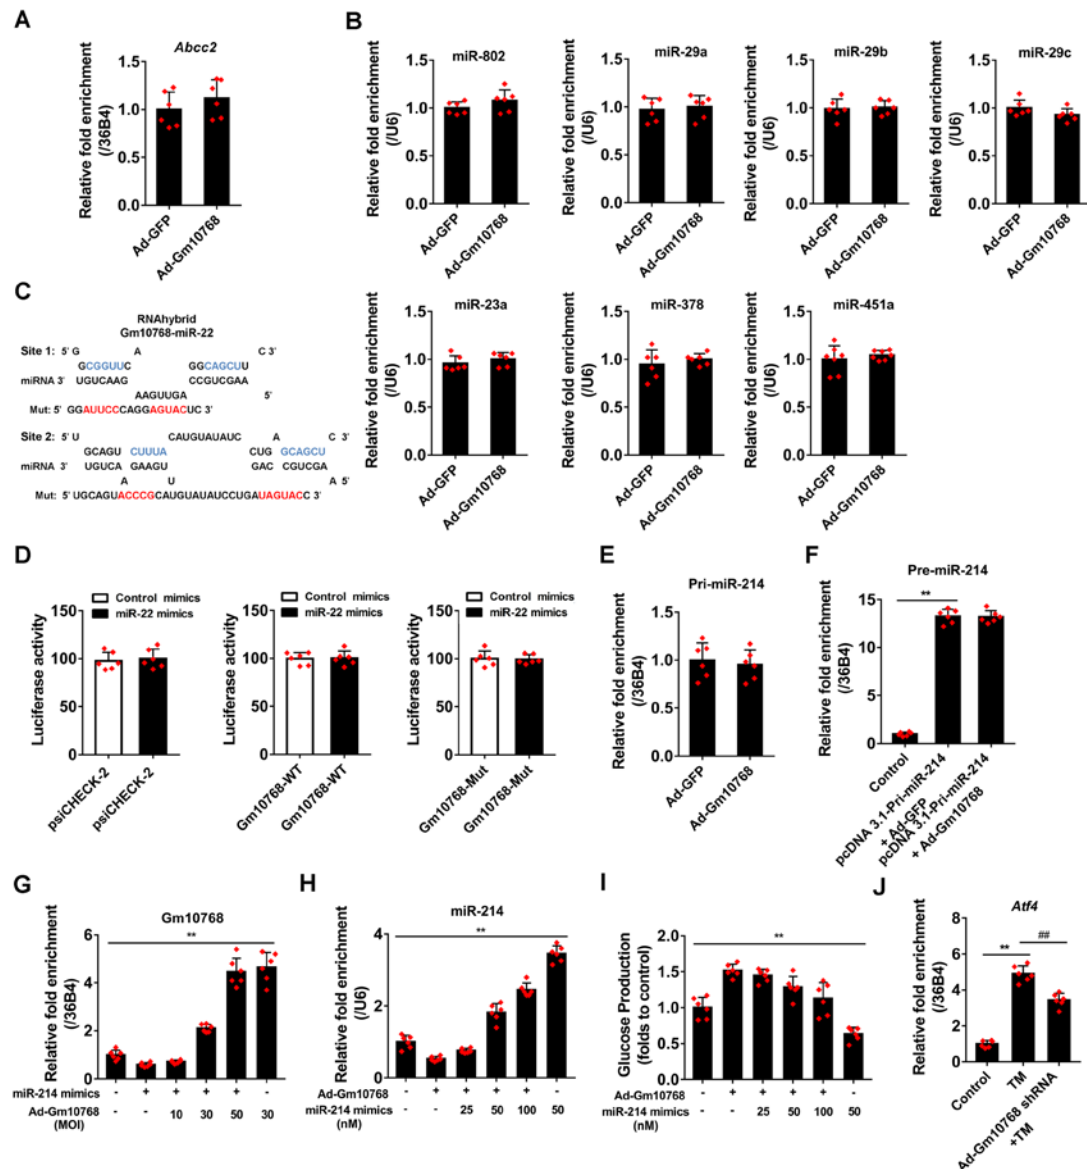

**Supplemental Figure 5. Mediation of miR-214-ATF4 axis in the activation of hepatic gluconeogenesis by Gm10768.** (A) Mouse primary hepatocytes were transduced with adenoviruses expressing Gm10768 or GFP for 48 h, and mRNA expression levels of *Abcc2* were assessed by RT-qPCR. (B) RT-qPCR analyses of known miRNAs involved in hepatic gluconeogenesis. (C) High-affinity binding sites of miR-22 in Gm10768 cDNA predicted by RNAhybrid software. Mutations in the sequence complementary to the seed region were also shown (original sequences were marked in blue, and the non-functional mutation sequences were marked in red). (D) Relative luciferase activity of Gm10768 reporter vectors regulated by miR-22. (E) RT-qPCR analysis of pri-miR-214 levels in hepatocytes treated as panel A. (F) RT-qPCR analysis of pre-miR-214 levels in mouse primary hepatocytes transduced with pcDNA 3.1 expressing pri-miR-214 for 12 h, followed by infection of Ad-Gm10768 or Ad-GFP for another 36 h. \*\* $P < 0.01$  vs. control group, unpaired  $t$ -test. (G) Validation of efficiency of Gm10768 overexpression by RT-qPCR in Ad-Gm10768-infected mouse



primary hepatocytes in the presence of miR-214 overexpression. \*\*P<0.01, one-way ANOVA. (H) Validation of efficiency of miR-214 overexpression by RT-qPCR. Mouse primary hepatocytes were transfected with different doses of miR-214 mimics or control mimics for 12 h, and then infected by adenoviruses encoding Gm10768 or GFP for 36 h. \*\*P<0.01, one-way ANOVA. (I) Glucose output assay in mouse primary hepatocytes treated as panel H. \*\*P<0.01, one-way ANOVA. (J) Regulation of *Atf4* mRNA expression level by Gm10768 in tunicamycin (TM)-induced ER stress. Primary hepatocytes were infected by adenoviruses encoding scramble shRNA or shRNA against Gm10768 for 42 h, and then treated with or without 3 µg/ml TM for another 6 h. \*\*P<0.01 vs. control group, one-way ANOVA. Hepatocytes used in all the experiments were isolated from six mice to do one batch of experiments, and three batches of experiments were performed. Data were performed as mean ± SD. Error bars represent the SD from the mean of three independent experiments.

## Supplemental Figure 6

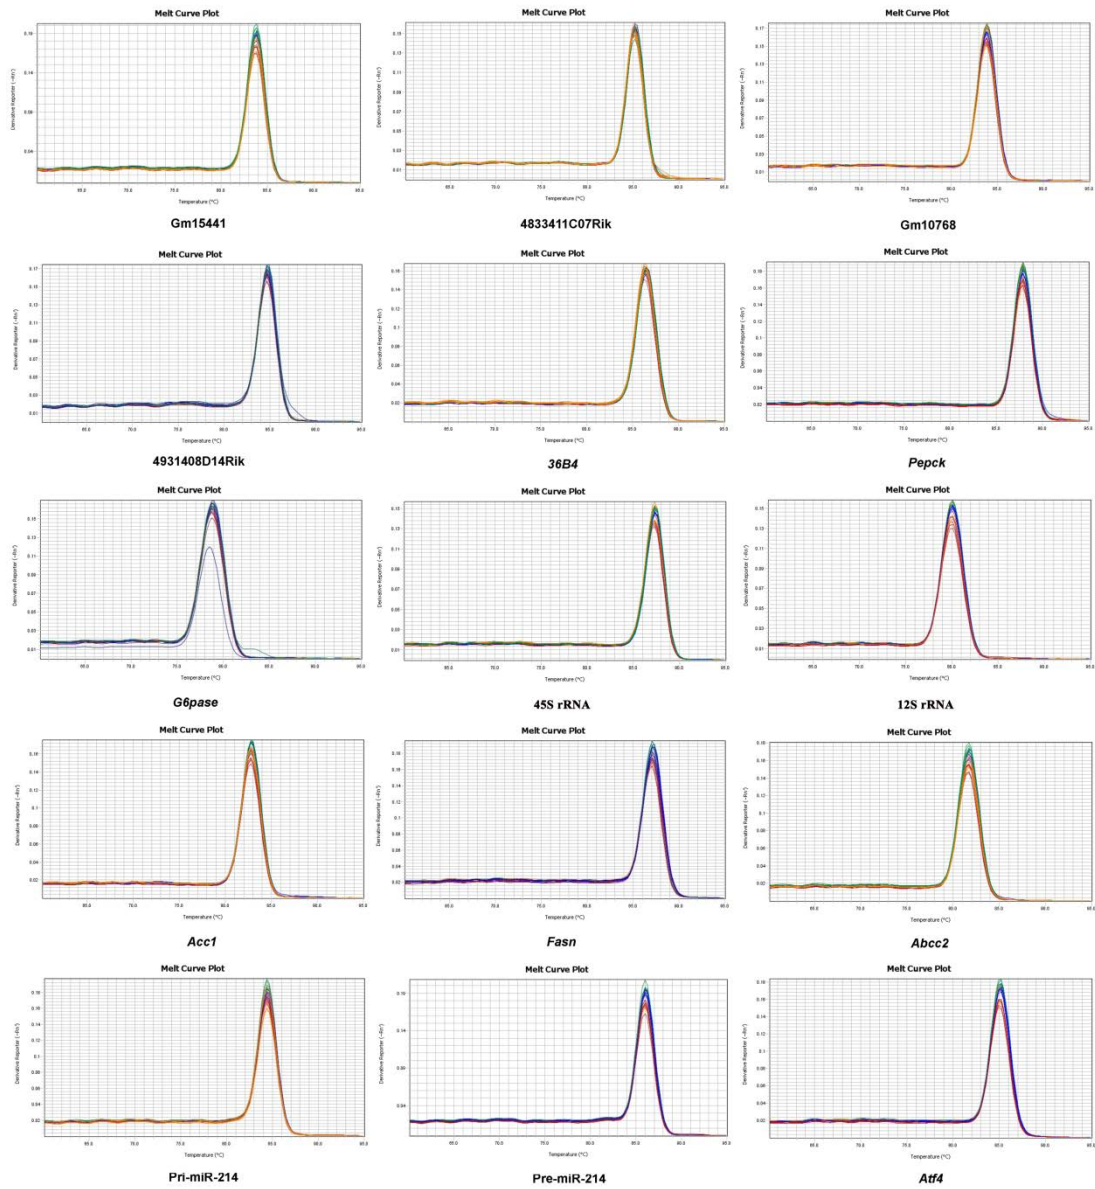

Supplemental Figure 6. Validation of RT-qPCR primers by melting curve analysis.

**Supplemental Table S1. Summarized information of reads mapping to the mouse genome (GRCm38 /mm10).**

|                              | <i>Ad libitum</i> feeding | 16-h fasting        | 16-h fasting followed by 8-h refeeding |
|------------------------------|---------------------------|---------------------|----------------------------------------|
| Total reads                  | 69,849,782                | 65,483,181          | 67,567,197                             |
| Total mapped                 | 66,244,619 (94.84%)       | 62,525,227 (95.48%) | 64,535,271 (95.51%)                    |
| Reads mapped in proper pairs | 62,110,832 (88.92%)       | 58,494,504 (89.33%) | 60,404,186 (89.40%)                    |
| Identified mRNAs             | 22,913                    | 24,864              | 23,579                                 |
| Identified LncRNAs           | 28,312                    | 31,947              | 29,332                                 |

**Supplemental Table 2. Inducible lncRNAs in the liver of 16-h fasted mice (fold changes > 3).**

| <b>Gene</b>        | <b><i>Ad libitum</i><br/>feeding</b> | <b>16-h fasting</b> | <b>Fold-change<br/>(Fasting/Feeding)</b> |
|--------------------|--------------------------------------|---------------------|------------------------------------------|
| fantom3_7420455A22 | 220                                  | 56822               | 258.28                                   |
| fantom3_7420402G03 | 178                                  | 44579               | 250.44                                   |
| fantom3_6820418A11 | 19                                   | 3216                | 169.26                                   |
| fantom3_G830027M03 | 2                                    | 199                 | 99.50                                    |
| fantom3_G930003I09 | 2                                    | 199                 | 99.50                                    |
| fantom3_C730049K07 | 2                                    | 164                 | 82.00                                    |
| fantom3_A530051E17 | 14                                   | 1137                | 81.21                                    |
| fantom3_9330161B17 | 15                                   | 755                 | 50.33                                    |
| fantom3_6330440N17 | 4                                    | 178                 | 44.50                                    |
| fantom3_E130304P04 | 1                                    | 39                  | 39.00                                    |
| fantom3_B230112G18 | 2                                    | 62                  | 31.00                                    |
| fantom3_B230114P17 | 59                                   | 1532                | 25.97                                    |
| fantom3_1110020O19 | 140                                  | 3176                | 22.69                                    |
| fantom3_C330015B08 | 1                                    | 22                  | 22.00                                    |
| fantom3_F830213D04 | 1                                    | 21                  | 21.00                                    |
| fantom3_A730020G14 | 2                                    | 41                  | 20.50                                    |
| fantom3_A130041H10 | 1                                    | 19                  | 19.00                                    |
| fantom3_G830024B15 | 2                                    | 38                  | 19.00                                    |
| fantom3_G730042J04 | 1                                    | 19                  | 19.00                                    |
| fantom3_I920061J03 | 38                                   | 718                 | 18.89                                    |
| fantom3_A530027E16 | 38                                   | 649                 | 17.08                                    |
| fantom3_C130061I16 | 1                                    | 16                  | 16.00                                    |
| fantom3_D030050I05 | 1                                    | 16                  | 16.00                                    |
| fantom3_5330407B06 | 125                                  | 1968                | 15.74                                    |
| fantom3_C730020I24 | 9                                    | 141                 | 15.67                                    |
| fantom3_9130202J21 | 5                                    | 78                  | 15.60                                    |
| fantom3_B230219G19 | 1295                                 | 19986               | 15.43                                    |
| fantom3_C730033N06 | 5                                    | 77                  | 15.40                                    |
| fantom3_A530016A22 | 1                                    | 15                  | 15.00                                    |
| fantom3_D130020M07 | 2                                    | 30                  | 15.00                                    |
| fantom3_1700030C10 | 1                                    | 15                  | 15.00                                    |
| fantom3_1700071A11 | 1                                    | 15                  | 15.00                                    |
| fantom3_F430013O13 | 2                                    | 29                  | 14.50                                    |
| fantom3_4931408D14 | 47                                   | 675                 | 14.36                                    |
| fantom3_G430020I22 | 1                                    | 14                  | 14.00                                    |
| fantom3_D930006P15 | 1                                    | 14                  | 14.00                                    |
| fantom3_4930592C13 | 1                                    | 14                  | 14.00                                    |
| fantom3_D930039J15 | 1                                    | 14                  | 14.00                                    |
| fantom3_A230101M12 | 1                                    | 14                  | 14.00                                    |

|                    |      |       |       |
|--------------------|------|-------|-------|
| fantom3_F530004J10 | 1    | 14    | 14.00 |
| fantom3_A130014B07 | 3    | 40    | 13.33 |
| BC055402           | 1    | 13    | 13.00 |
| fantom3_6530402A05 | 1    | 13    | 13.00 |
| 5330411J11Rik      | 1    | 13    | 13.00 |
| fantom3_5330411J11 | 1    | 13    | 13.00 |
| fantom3_2310004O12 | 1    | 13    | 13.00 |
| fantom3_F830116C18 | 1    | 13    | 13.00 |
| fantom3_G730010G10 | 1    | 13    | 13.00 |
| fantom3_B020039J05 | 1    | 13    | 13.00 |
| fantom3_9630015P16 | 27   | 343   | 12.70 |
| fantom3_F830020H21 | 6    | 75    | 12.50 |
| fantom3_4733401D01 | 2    | 25    | 12.50 |
| fantom3_2810007J24 | 1151 | 14038 | 12.20 |
| 1700003D09Rik      | 1    | 12    | 12.00 |
| fantom3_1700003D09 | 1    | 12    | 12.00 |
| fantom3_D830033O04 | 1    | 12    | 12.00 |
| fantom3_1700061H18 | 1    | 12    | 12.00 |
| fantom3_B330013B20 | 30   | 350   | 11.67 |
| fantom3_9030616G12 | 86   | 1001  | 11.64 |
| fantom3_3110013K01 | 23   | 266   | 11.57 |
| B930025P03Rik      | 37   | 426   | 11.51 |
| fantom3_B930025P03 | 37   | 426   | 11.51 |
| fantom3_1700025J06 | 2    | 23    | 11.50 |
| fantom3_1810044K17 | 20   | 230   | 11.50 |
| fantom3_4932433B11 | 2    | 22    | 11.00 |
| Serp2              | 1    | 11    | 11.00 |
| fantom3_F830047K07 | 1    | 11    | 11.00 |
| D830026I12Rik      | 1    | 11    | 11.00 |
| D830026I12Rik      | 1    | 11    | 11.00 |
| fantom3_C130090D04 | 1    | 11    | 11.00 |
| 2810442N19Rik      | 2    | 22    | 11.00 |
| fantom3_2810442N19 | 2    | 22    | 11.00 |
| fantom3_F830004M11 | 4    | 44    | 11.00 |
| fantom3_A830088F04 | 2    | 22    | 11.00 |
| fantom3_7030406K13 | 1    | 11    | 11.00 |
| fantom3_5430431D22 | 1    | 11    | 11.00 |
| fantom3_1500015B05 | 1    | 11    | 11.00 |
| fantom3_C130033B13 | 2    | 22    | 11.00 |
| fantom3_A530066O14 | 1    | 11    | 11.00 |
| E430016F16Rik      | 1    | 11    | 11.00 |
| fantom3_E430016F16 | 1    | 11    | 11.00 |
| fantom3_A130039P07 | 1    | 11    | 11.00 |
| fantom3_2610028L16 | 1    | 11    | 11.00 |

|                    |     |      |       |
|--------------------|-----|------|-------|
| fantom3_C130061I10 | 1   | 11   | 11.00 |
| fantom3_2810438M17 | 1   | 11   | 11.00 |
| 1810053B23Rik      | 18  | 189  | 10.50 |
| fantom3_1810053B23 | 18  | 189  | 10.50 |
| 1810053B23Rik      | 16  | 168  | 10.50 |
| fantom3_C130007P11 | 2   | 21   | 10.50 |
| 1810053B23Rik      | 16  | 165  | 10.31 |
| fantom3_1810008L18 | 16  | 165  | 10.31 |
| fantom3_D030003A15 | 12  | 123  | 10.25 |
| fantom3_C730005B11 | 280 | 2865 | 10.23 |
| fantom3_G530022M02 | 1   | 10   | 10.00 |
| fantom3_1700096K11 | 1   | 10   | 10.00 |
| fantom3_F830036E24 | 3   | 30   | 10.00 |
| fantom3_C230059K22 | 1   | 10   | 10.00 |
| 2610028E06Rik      | 1   | 10   | 10.00 |
| fantom3_6330509E18 | 1   | 10   | 10.00 |
| fantom3_I920077F18 | 1   | 10   | 10.00 |
| fantom3_A730082C21 | 1   | 10   | 10.00 |
| fantom3_I730058H16 | 2   | 20   | 10.00 |
| fantom3_D330015B14 | 2   | 20   | 10.00 |
| fantom3_7120411H13 | 1   | 10   | 10.00 |
| fantom3_6720419D17 | 2   | 20   | 10.00 |
| fantom3_4932419K24 | 1   | 10   | 10.00 |
| fantom3_G630037M01 | 1   | 10   | 10.00 |
| fantom3_9630009A13 | 1   | 10   | 10.00 |
| fantom3_E030033I04 | 4   | 39   | 9.75  |
| fantom3_D630050E03 | 2   | 19   | 9.50  |
| fantom3_B230214C06 | 2   | 19   | 9.50  |
| fantom3_6430530A15 | 2   | 19   | 9.50  |
| fantom3_B230396O12 | 2   | 19   | 9.50  |
| fantom3_G730013B05 | 2   | 19   | 9.50  |
| G730013B05Rik      | 2   | 19   | 9.50  |
| fantom3_C730031D20 | 153 | 1452 | 9.49  |
| fantom3_F830221J08 | 11  | 104  | 9.45  |
| fantom3_A530063G14 | 6   | 56   | 9.33  |
| fantom3_G130202F18 | 11  | 102  | 9.27  |
| fantom3_4933425E08 | 4   | 37   | 9.25  |
| 1810053B23Rik      | 10  | 91   | 9.10  |
| fantom3_1810005K16 | 10  | 91   | 9.10  |
| 1810053B23Rik      | 10  | 91   | 9.10  |
| fantom3_1810056K14 | 10  | 91   | 9.10  |
| fantom3_C730014M21 | 37  | 335  | 9.05  |
| fantom3_9530068D04 | 1   | 9    | 9.00  |
| fantom3_2010107C10 | 1   | 9    | 9.00  |

|                    |      |       |      |
|--------------------|------|-------|------|
| Rprl3              | 1    | 9     | 9.00 |
| fantom3_1700019P01 | 2    | 18    | 9.00 |
| fantom3_A130098G01 | 1    | 9     | 9.00 |
| Gm872              | 1    | 9     | 9.00 |
| fantom3_6030476D12 | 1    | 9     | 9.00 |
| fantom3_C230070C12 | 1    | 9     | 9.00 |
| fantom3_A630008C13 | 1    | 9     | 9.00 |
| fantom3_D930004C15 | 1    | 9     | 9.00 |
| Gm15401            | 5    | 45    | 9.00 |
| fantom3_B930054K19 | 1    | 9     | 9.00 |
| fantom3_B830038L20 | 1    | 9     | 9.00 |
| fantom3_9530083L01 | 1    | 9     | 9.00 |
| fantom3_A730047N12 | 1    | 9     | 9.00 |
| fantom3_D230039F21 | 1    | 9     | 9.00 |
| AI854703           | 1    | 9     | 9.00 |
| fantom3_2310014F06 | 1    | 9     | 9.00 |
| Dio3os             | 2    | 18    | 9.00 |
| fantom3_C230025E06 | 1    | 9     | 9.00 |
| B430212C06Rik      | 2    | 18    | 9.00 |
| fantom3_7120411O12 | 2    | 18    | 9.00 |
| fantom3_E230008F14 | 2    | 18    | 9.00 |
| A530065N20Rik      | 1    | 9     | 9.00 |
| fantom3_A530065N20 | 1    | 9     | 9.00 |
| fantom3_7530406I19 | 1    | 9     | 9.00 |
| fantom3_C630010O07 | 1    | 9     | 9.00 |
| Gm15441            | 685  | 6124  | 8.94 |
| fantom3_F430107P11 | 685  | 6123  | 8.94 |
| fantom3_9630007F23 | 3    | 26    | 8.67 |
| Gm20597            | 2    | 17    | 8.50 |
| fantom3_A830093M16 | 2    | 17    | 8.50 |
| fantom3_K530005K05 | 4    | 34    | 8.50 |
| G730013B05Rik      | 2    | 17    | 8.50 |
| fantom3_6030407J18 | 2    | 17    | 8.50 |
| fantom3_A430107B04 | 3    | 25    | 8.33 |
| fantom3_A630086I18 | 13   | 108   | 8.31 |
| fantom3_F830012H14 | 1905 | 15757 | 8.27 |
| Rdh18-ps           | 19   | 153   | 8.05 |
| fantom3_E030020K07 | 2    | 16    | 8.00 |
| fantom3_K230002P08 | 1    | 8     | 8.00 |
| fantom3_A230072F23 | 1    | 8     | 8.00 |
| 4930431P03Rik      | 1    | 8     | 8.00 |
| fantom3_2810032E02 | 1    | 8     | 8.00 |
| fantom3_A730011B16 | 1    | 8     | 8.00 |
| Gm16325            | 1    | 8     | 8.00 |

|                    |    |     |      |
|--------------------|----|-----|------|
| fantom3_4930473B18 | 2  | 16  | 8.00 |
| fantom3_A130091L06 | 1  | 8   | 8.00 |
| fantom3_A530048B07 | 1  | 8   | 8.00 |
| fantom3_4930579H20 | 1  | 8   | 8.00 |
| fantom3_B230119K05 | 1  | 8   | 8.00 |
| fantom3_A230043B06 | 1  | 8   | 8.00 |
| fantom3_F830210C18 | 1  | 8   | 8.00 |
| Abca16             | 1  | 8   | 8.00 |
| fantom3_B930023M13 | 1  | 8   | 8.00 |
| fantom3_B930098F14 | 1  | 8   | 8.00 |
| fantom3_D630009D03 | 2  | 16  | 8.00 |
| fantom3_C130041P16 | 1  | 8   | 8.00 |
| fantom3_C030030N07 | 2  | 16  | 8.00 |
| fantom3_A730080H01 | 2  | 16  | 8.00 |
| fantom3_A130029E23 | 2  | 16  | 8.00 |
| fantom3_4931414O13 | 1  | 8   | 8.00 |
| fantom3_2810047E18 | 1  | 8   | 8.00 |
| fantom3_A530025K05 | 1  | 8   | 8.00 |
| fantom3_A830089K19 | 1  | 8   | 8.00 |
| fantom3_4933417O19 | 1  | 8   | 8.00 |
| fantom3_4930408N11 | 1  | 8   | 8.00 |
| fantom3_3010023L08 | 1  | 8   | 8.00 |
| fantom3_F830226M06 | 2  | 16  | 8.00 |
| fantom3_A130019C19 | 1  | 8   | 8.00 |
| fantom3_4933435E02 | 1  | 8   | 8.00 |
| fantom3_9630003L11 | 1  | 8   | 8.00 |
| fantom3_B230215P06 | 1  | 8   | 8.00 |
| fantom3_C530050M13 | 2  | 16  | 8.00 |
| fantom3_B930057K18 | 2  | 16  | 8.00 |
| fantom3_8030487G03 | 4  | 32  | 8.00 |
| fantom3_B230213I15 | 1  | 8   | 8.00 |
| fantom3_B930037H11 | 1  | 8   | 8.00 |
| fantom3_G530110D04 | 1  | 8   | 8.00 |
| fantom3_9530019L17 | 1  | 8   | 8.00 |
| fantom3_1700080G11 | 5  | 40  | 8.00 |
| fantom3_A430025J19 | 3  | 23  | 7.67 |
| fantom3_4930458D05 | 10 | 76  | 7.60 |
| fantom3_2310031A18 | 37 | 280 | 7.57 |
| AY512915           | 2  | 15  | 7.50 |
| fantom3_B020008J18 | 2  | 15  | 7.50 |
| fantom3_1700112J16 | 2  | 15  | 7.50 |
| fantom3_I1C0037K09 | 2  | 15  | 7.50 |
| fantom3_F830012C21 | 8  | 59  | 7.38 |
| fantom3_D330017F15 | 14 | 103 | 7.36 |



|                    |    |     |      |
|--------------------|----|-----|------|
| fantom3_C430005K24 | 3  | 22  | 7.33 |
| fantom3_A530024C12 | 61 | 443 | 7.26 |
| fantom3_4833438M18 | 5  | 36  | 7.20 |
| fantom3_D130083J23 | 2  | 14  | 7.00 |
| fantom3_I1C0027L02 | 2  | 14  | 7.00 |
| fantom3_I1C0029E05 | 2  | 14  | 7.00 |
| fantom3_6330520A03 | 2  | 14  | 7.00 |
| fantom3_D130067P18 | 1  | 7   | 7.00 |
| fantom3_7120441B17 | 1  | 7   | 7.00 |
| fantom3_G370129C06 | 1  | 7   | 7.00 |
| fantom3_K230308O10 | 1  | 7   | 7.00 |
| fantom3_D330045B20 | 1  | 7   | 7.00 |
| fantom3_A430041M04 | 1  | 7   | 7.00 |
| fantom3_C530029G05 | 1  | 7   | 7.00 |
| 1810053B23Rik      | 10 | 70  | 7.00 |
| fantom3_3321403J09 | 2  | 14  | 7.00 |
| Dlk1               | 2  | 14  | 7.00 |
| fantom3_5832417M09 | 2  | 14  | 7.00 |
| fantom3_A130064J04 | 2  | 14  | 7.00 |
| Btnl5              | 1  | 7   | 7.00 |
| fantom3_8430408J09 | 1  | 7   | 7.00 |
| fantom3_8430415M10 | 1  | 7   | 7.00 |
| 1810020O05Rik      | 1  | 7   | 7.00 |
| fantom3_1810020O05 | 1  | 7   | 7.00 |
| fantom3_A430098J15 | 1  | 7   | 7.00 |
| fantom3_B930025I16 | 1  | 7   | 7.00 |
| fantom3_4932704C20 | 4  | 28  | 7.00 |
| fantom3_K530032D24 | 2  | 14  | 7.00 |
| fantom3_D330030J09 | 1  | 7   | 7.00 |
| fantom3_C130093P08 | 2  | 14  | 7.00 |
| fantom3_K430343K20 | 1  | 7   | 7.00 |
| St18               | 1  | 7   | 7.00 |
| St18               | 1  | 7   | 7.00 |
| fantom3_9430041C13 | 1  | 7   | 7.00 |
| fantom3_6720480K08 | 1  | 7   | 7.00 |
| fantom3_5930418H01 | 2  | 14  | 7.00 |
| fantom3_A130074A14 | 2  | 14  | 7.00 |
| fantom3_1700040L02 | 6  | 42  | 7.00 |
| fantom3_E130002L11 | 2  | 14  | 7.00 |
| fantom3_9330188P03 | 1  | 7   | 7.00 |
| fantom3_B930074B15 | 1  | 7   | 7.00 |
| fantom3_D030015J17 | 1  | 7   | 7.00 |
| fantom3_I1C0021P08 | 1  | 7   | 7.00 |
| fantom3_D330006A22 | 1  | 7   | 7.00 |

|                    |     |      |      |
|--------------------|-----|------|------|
| fantom3_9830101G19 | 1   | 7    | 7.00 |
| fantom3_5033430G19 | 1   | 7    | 7.00 |
| fantom3_B230315B10 | 1   | 7    | 7.00 |
| fantom3_2900069N19 | 1   | 7    | 7.00 |
| fantom3_E230035N11 | 1   | 7    | 7.00 |
| fantom3_C230007P09 | 2   | 14   | 7.00 |
| fantom3_4833417J20 | 86  | 589  | 6.85 |
| 4921508A21Rik      | 4   | 27   | 6.75 |
| fantom3_7120483E20 | 774 | 5156 | 6.66 |
| fantom3_2210419I04 | 73  | 486  | 6.66 |
| fantom3_7120418K18 | 59  | 391  | 6.63 |
| fantom3_D630004K10 | 65  | 426  | 6.55 |
| fantom3_9630012P04 | 2   | 13   | 6.50 |
| fantom3_F530010N02 | 2   | 13   | 6.50 |
| D5Ertd605e         | 2   | 13   | 6.50 |
| fantom3_A130096F13 | 2   | 13   | 6.50 |
| fantom3_D130058E02 | 2   | 13   | 6.50 |
| fantom3_1190016A08 | 2   | 13   | 6.50 |
| Gm5084             | 2   | 13   | 6.50 |
| fantom3_9530058N13 | 2   | 13   | 6.50 |
| fantom3_D430004L15 | 2   | 13   | 6.50 |
| fantom3_C130099N11 | 2   | 13   | 6.50 |
| Gm5607             | 2   | 13   | 6.50 |
| fantom3_B230302A12 | 2   | 13   | 6.50 |
| fantom3_B130063I02 | 2   | 13   | 6.50 |
| fantom3_A930030P22 | 2   | 13   | 6.50 |
| fantom3_A830020C21 | 2   | 13   | 6.50 |
| fantom3_E130119I16 | 2   | 13   | 6.50 |
| fantom3_A630066O22 | 2   | 13   | 6.50 |
| fantom3_C230036G10 | 2   | 13   | 6.50 |
| Ano5               | 5   | 32   | 6.40 |
| fantom3_9330209H12 | 3   | 19   | 6.33 |
| fantom3_5730424C05 | 10  | 63   | 6.30 |
| fantom3_G630020J15 | 4   | 25   | 6.25 |
| 1700030C10Rik      | 11  | 68   | 6.18 |
| Gm15401            | 6   | 37   | 6.17 |
| fantom3_E030010N08 | 2   | 12   | 6.00 |
| fantom3_1700007I02 | 2   | 12   | 6.00 |
| fantom3_4930512M02 | 2   | 12   | 6.00 |
| fantom3_A530056G09 | 2   | 12   | 6.00 |
| fantom3_4933407E14 | 2   | 12   | 6.00 |
| fantom3_9630004D11 | 1   | 6    | 6.00 |
| fantom3_1810034M13 | 1   | 6    | 6.00 |
| 4930447K03Rik      | 1   | 6    | 6.00 |

|                    |   |    |      |
|--------------------|---|----|------|
| fantom3_C130037J22 | 1 | 6  | 6.00 |
| fantom3_C630047B18 | 1 | 6  | 6.00 |
| fantom3_7120494P12 | 1 | 6  | 6.00 |
| fantom3_A830095B13 | 1 | 6  | 6.00 |
| fantom3_A730065B01 | 1 | 6  | 6.00 |
| fantom3_6330536B20 | 1 | 6  | 6.00 |
| fantom3_F830018F05 | 2 | 12 | 6.00 |
| fantom3_5330429C20 | 2 | 12 | 6.00 |
| fantom3_F530201O18 | 2 | 12 | 6.00 |
| fantom3_F530212A09 | 2 | 12 | 6.00 |
| fantom3_9530073A13 | 2 | 12 | 6.00 |
| fantom3_A330068F07 | 2 | 12 | 6.00 |
| 1700007P06Rik      | 1 | 6  | 6.00 |
| fantom3_1700007P06 | 1 | 6  | 6.00 |
| fantom3_4930500E12 | 1 | 6  | 6.00 |
| fantom3_G430061M04 | 1 | 6  | 6.00 |
| fantom3_4930455M05 | 1 | 6  | 6.00 |
| fantom3_B230216G19 | 1 | 6  | 6.00 |
| fantom3_1700055M08 | 1 | 6  | 6.00 |
| fantom3_D930022I19 | 1 | 6  | 6.00 |
| fantom3_4930592I03 | 1 | 6  | 6.00 |
| fantom3_4933401L05 | 1 | 6  | 6.00 |
| fantom3_1500031I19 | 1 | 6  | 6.00 |
| fantom3_9930009K02 | 2 | 12 | 6.00 |
| fantom3_3732407C23 | 2 | 12 | 6.00 |
| fantom3_D230040J18 | 2 | 12 | 6.00 |
| fantom3_6430527A19 | 2 | 12 | 6.00 |
| fantom3_C130048D22 | 1 | 6  | 6.00 |
| fantom3_C230022H20 | 1 | 6  | 6.00 |
| fantom3_F630036L05 | 1 | 6  | 6.00 |
| fantom3_2310003L01 | 1 | 6  | 6.00 |
| fantom3_G630016F13 | 1 | 6  | 6.00 |
| Gm16497            | 1 | 6  | 6.00 |
| fantom3_I920167N20 | 1 | 6  | 6.00 |
| fantom3_B130019P18 | 1 | 6  | 6.00 |
| fantom3_9230113L14 | 1 | 6  | 6.00 |
| G6b                | 1 | 6  | 6.00 |
| 4930511M06Rik      | 1 | 6  | 6.00 |
| fantom3_4930511M06 | 1 | 6  | 6.00 |
| fantom3_B230315C17 | 1 | 6  | 6.00 |
| fantom3_F830017M06 | 1 | 6  | 6.00 |
| fantom3_B930051H10 | 1 | 6  | 6.00 |
| fantom3_9930025K09 | 1 | 6  | 6.00 |
| fantom3_B930082J09 | 1 | 6  | 6.00 |

|                    |      |       |      |
|--------------------|------|-------|------|
| fantom3_F830006M07 | 1    | 6     | 6.00 |
| fantom3_9330171A06 | 1    | 6     | 6.00 |
| fantom3_9630046I24 | 1    | 6     | 6.00 |
| fantom3_7420436I21 | 1    | 6     | 6.00 |
| fantom3_B230343F10 | 3    | 18    | 6.00 |
| fantom3_D130073P12 | 2    | 12    | 6.00 |
| fantom3_A230020K01 | 2    | 12    | 6.00 |
| fantom3_5330411P19 | 2    | 12    | 6.00 |
| fantom3_D930017O19 | 1    | 6     | 6.00 |
| fantom3_E430019B19 | 1    | 6     | 6.00 |
| fantom3_G630029K15 | 1    | 6     | 6.00 |
| fantom3_F830038B19 | 1    | 6     | 6.00 |
| 6330410L21Rik      | 1    | 6     | 6.00 |
| fantom3_6330410L21 | 1    | 6     | 6.00 |
| fantom3_A330043L21 | 1    | 6     | 6.00 |
| fantom3_A330079B12 | 1    | 6     | 6.00 |
| fantom3_F930120N09 | 1    | 6     | 6.00 |
| 3110039I08Rik      | 1    | 6     | 6.00 |
| fantom3_0910001L11 | 1    | 6     | 6.00 |
| fantom3_3110039I08 | 1    | 6     | 6.00 |
| fantom3_C130090P09 | 1    | 6     | 6.00 |
| fantom3_E130301F18 | 1    | 6     | 6.00 |
| fantom3_9630056H19 | 2    | 12    | 6.00 |
| fantom3_A230013C21 | 1    | 6     | 6.00 |
| fantom3_A530030E21 | 1    | 6     | 6.00 |
| fantom3_D930037F10 | 1    | 6     | 6.00 |
| fantom3_E330005O20 | 1    | 6     | 6.00 |
| fantom3_E430003K09 | 1    | 6     | 6.00 |
| fantom3_B930091H14 | 4    | 24    | 6.00 |
| fantom3_B930093H17 | 4    | 24    | 6.00 |
| fantom3_4930545H10 | 2    | 12    | 6.00 |
| fantom3_C230090M03 | 2    | 12    | 6.00 |
| fantom3_D530008E22 | 2    | 12    | 6.00 |
| fantom3_D430025L05 | 2    | 12    | 6.00 |
| fantom3_D130094B22 | 1    | 6     | 6.00 |
| fantom3_B930098M14 | 2    | 12    | 6.00 |
| fantom3_A830023F21 | 1    | 6     | 6.00 |
| fantom3_G630068J03 | 1    | 6     | 6.00 |
| fantom3_D130048G10 | 1    | 6     | 6.00 |
| fantom3_E430029I17 | 1    | 6     | 6.00 |
| fantom3_B830037D16 | 1    | 6     | 6.00 |
| 2310005A03Rik      | 1    | 6     | 6.00 |
| fantom3_C730040C05 | 3904 | 23241 | 5.95 |
| 4833411C07Rik      | 570  | 3380  | 5.93 |

|                    |      |      |      |
|--------------------|------|------|------|
| fantom3_F530109J04 | 590  | 3469 | 5.88 |
| fantom3_4930565D21 | 4    | 23   | 5.75 |
| fantom3_2810043G22 | 8    | 46   | 5.75 |
| fantom3_6330531L09 | 63   | 360  | 5.71 |
| fantom3_5330434L22 | 7    | 40   | 5.71 |
| fantom3_9830005I08 | 3    | 17   | 5.67 |
| fantom3_A430103C09 | 3    | 17   | 5.67 |
| Smarca5-ps         | 3    | 17   | 5.67 |
| fantom3_A530024J10 | 5    | 28   | 5.60 |
| fantom3_2310076L09 | 1519 | 8493 | 5.59 |
| fantom3_6430516O08 | 9    | 50   | 5.56 |
| fantom3_2310069G16 | 2    | 11   | 5.50 |
| fantom3_A430055B20 | 2    | 11   | 5.50 |
| fantom3_D230015D14 | 2    | 11   | 5.50 |
| fantom3_2510009M23 | 4    | 22   | 5.50 |
| fantom3_A630005L15 | 2    | 11   | 5.50 |
| fantom3_9630032I19 | 2    | 11   | 5.50 |
| fantom3_2010013B24 | 2    | 11   | 5.50 |
| fantom3_C130073D18 | 4    | 22   | 5.50 |
| fantom3_D930019O06 | 2    | 11   | 5.50 |
| fantom3_D430017G14 | 2    | 11   | 5.50 |
| fantom3_C030007I01 | 2    | 11   | 5.50 |
| fantom3_G430037M03 | 2    | 11   | 5.50 |
| fantom3_B230354D22 | 2    | 11   | 5.50 |
| Gm16197            | 2    | 11   | 5.50 |
| fantom3_B930015H15 | 2    | 11   | 5.50 |
| fantom3_9630009O18 | 4    | 22   | 5.50 |
| fantom3_C130086H07 | 2    | 11   | 5.50 |
| fantom3_F830022K14 | 2    | 11   | 5.50 |
| fantom3_4932422C18 | 2    | 11   | 5.50 |
| fantom3_D330013J16 | 2    | 11   | 5.50 |
| fantom3_B930022I23 | 4    | 22   | 5.50 |
| fantom3_C630003L08 | 2    | 11   | 5.50 |
| fantom3_B230033C14 | 2    | 11   | 5.50 |
| fantom3_A530021B03 | 2    | 11   | 5.50 |
| fantom3_D730044B07 | 4    | 22   | 5.50 |
| fantom3_A530024I22 | 2    | 11   | 5.50 |
| fantom3_D230009L05 | 2    | 11   | 5.50 |
| fantom3_E330033J16 | 8    | 43   | 5.38 |
| fantom3_G630001H16 | 330  | 1763 | 5.34 |
| fantom3_D230019E14 | 3    | 16   | 5.33 |
| fantom3_B230368G18 | 3    | 16   | 5.33 |
| fantom3_A430072O03 | 3    | 16   | 5.33 |
| fantom3_D430001N20 | 3    | 16   | 5.33 |

|                    |      |       |      |
|--------------------|------|-------|------|
| fantom3_A230105L22 | 3    | 16    | 5.33 |
| fantom3_G530012B12 | 3    | 16    | 5.33 |
| fantom3_A630006J12 | 3    | 16    | 5.33 |
| fantom3_6330439G07 | 246  | 1311  | 5.33 |
| fantom3_A530092N03 | 37   | 196   | 5.30 |
| fantom3_B230208B08 | 4    | 21    | 5.25 |
| fantom3_D430032L03 | 4    | 21    | 5.25 |
| fantom3_6430589E07 | 4    | 21    | 5.25 |
| fantom3_E130002K22 | 12   | 63    | 5.25 |
| fantom3_A230098N19 | 4    | 21    | 5.25 |
| fantom3_D030044K10 | 50   | 262   | 5.24 |
| fantom3_C330021I02 | 268  | 1386  | 5.17 |
| Cyp3a25            | 8828 | 45617 | 5.17 |
| fantom3_E230034P17 | 124  | 635   | 5.12 |
| fantom3_F830020G23 | 550  | 2803  | 5.10 |
| fantom3_A630089L15 | 134  | 678   | 5.06 |
| fantom3_A830014L16 | 4    | 20    | 5.00 |
| fantom3_8030487I24 | 2    | 10    | 5.00 |
| fantom3_A230080N22 | 2    | 10    | 5.00 |
| fantom3_6330582C22 | 2    | 10    | 5.00 |
| fantom3_F930027O16 | 2    | 10    | 5.00 |
| fantom3_5730552O08 | 2    | 10    | 5.00 |
| E130018N17Rik      | 2    | 10    | 5.00 |
| fantom3_4932418B15 | 2    | 10    | 5.00 |
| fantom3_E130018N17 | 2    | 10    | 5.00 |
| 4930564K09Rik      | 2    | 10    | 5.00 |
| 4930564K09Rik      | 2    | 10    | 5.00 |
| fantom3_4931406K06 | 2    | 10    | 5.00 |
| fantom3_A330041C21 | 2    | 10    | 5.00 |
| fantom3_B130022O15 | 2    | 10    | 5.00 |
| fantom3_C230032F09 | 2    | 10    | 5.00 |
| fantom3_9830139E03 | 2    | 10    | 5.00 |
| fantom3_A330001A19 | 1    | 5     | 5.00 |
| Vsig8              | 1    | 5     | 5.00 |
| fantom3_B830043G20 | 1    | 5     | 5.00 |
| fantom3_7030405N17 | 1    | 5     | 5.00 |
| fantom3_F830205A03 | 1    | 5     | 5.00 |
| fantom3_2810481J17 | 1    | 5     | 5.00 |
| fantom3_4932410A21 | 1    | 5     | 5.00 |
| fantom3_A430014K01 | 1    | 5     | 5.00 |
| fantom3_1100001H14 | 1    | 5     | 5.00 |
| fantom3_7120452I05 | 1    | 5     | 5.00 |
| fantom3_F830001L21 | 1    | 5     | 5.00 |
| fantom3_1700082G17 | 1    | 5     | 5.00 |

|                    |   |    |      |
|--------------------|---|----|------|
| fantom3_B230397F05 | 1 | 5  | 5.00 |
| Gm15412            | 1 | 5  | 5.00 |
| fantom3_9330185H22 | 1 | 5  | 5.00 |
| fantom3_A230015O16 | 6 | 30 | 5.00 |
| fantom3_F830013F05 | 8 | 40 | 5.00 |
| fantom3_E330028E05 | 2 | 10 | 5.00 |
| fantom3_F430010F14 | 2 | 10 | 5.00 |
| fantom3_4832424L05 | 2 | 10 | 5.00 |
| fantom3_A730069A18 | 2 | 10 | 5.00 |
| fantom3_A830013M21 | 2 | 10 | 5.00 |
| fantom3_A330007M14 | 2 | 10 | 5.00 |
| fantom3_9230110L19 | 2 | 10 | 5.00 |
| fantom3_C230047M17 | 2 | 10 | 5.00 |
| fantom3_D230009B17 | 2 | 10 | 5.00 |
| fantom3_B930015J12 | 1 | 5  | 5.00 |
| fantom3_C330017D18 | 1 | 5  | 5.00 |
| fantom3_1700037F03 | 1 | 5  | 5.00 |
| fantom3_1700042M18 | 1 | 5  | 5.00 |
| fantom3_G530009E20 | 1 | 5  | 5.00 |
| fantom3_A430091P18 | 1 | 5  | 5.00 |
| fantom3_1700012D16 | 1 | 5  | 5.00 |
| fantom3_1700021L23 | 1 | 5  | 5.00 |
| fantom3_G430084B08 | 1 | 5  | 5.00 |
| fantom3_F930020O14 | 1 | 5  | 5.00 |
| fantom3_6820414B21 | 2 | 10 | 5.00 |
| fantom3_B830019E21 | 2 | 10 | 5.00 |
| fantom3_A630033D21 | 2 | 10 | 5.00 |
| fantom3_A630046N03 | 2 | 10 | 5.00 |
| Gm20098            | 2 | 10 | 5.00 |
| fantom3_C230065K23 | 2 | 10 | 5.00 |
| fantom3_D130002B20 | 2 | 10 | 5.00 |
| fantom3_B020016K23 | 7 | 35 | 5.00 |
| fantom3_E130104O17 | 3 | 15 | 5.00 |
| fantom3_9630039A10 | 4 | 20 | 5.00 |
| fantom3_4833427M02 | 2 | 10 | 5.00 |
| fantom3_A430099A21 | 2 | 10 | 5.00 |
| fantom3_G530023E11 | 2 | 10 | 5.00 |
| Hoxa11as           | 2 | 10 | 5.00 |
| fantom3_D630027P12 | 1 | 5  | 5.00 |
| fantom3_C230074L02 | 1 | 5  | 5.00 |
| fantom3_1700011M20 | 1 | 5  | 5.00 |
| fantom3_7120474E19 | 1 | 5  | 5.00 |
| fantom3_F630107N01 | 1 | 5  | 5.00 |
| fantom3_4930412L05 | 1 | 5  | 5.00 |

|                    |   |    |      |
|--------------------|---|----|------|
| fantom3_A230033K07 | 1 | 5  | 5.00 |
| fantom3_D430026G21 | 1 | 5  | 5.00 |
| fantom3_4933416K23 | 1 | 5  | 5.00 |
| fantom3_2210411A11 | 1 | 5  | 5.00 |
| fantom3_A530096N14 | 2 | 10 | 5.00 |
| Gm13238            | 6 | 30 | 5.00 |
| fantom3_D030062D16 | 2 | 10 | 5.00 |
| fantom3_8030401H20 | 2 | 10 | 5.00 |
| fantom3_4930584B20 | 1 | 5  | 5.00 |
| fantom3_A930027E12 | 1 | 5  | 5.00 |
| fantom3_D330023H14 | 1 | 5  | 5.00 |
| 4930509J09Rik      | 1 | 5  | 5.00 |
| fantom3_1190003I05 | 1 | 5  | 5.00 |
| fantom3_4930509J09 | 1 | 5  | 5.00 |
| Gm9054             | 1 | 5  | 5.00 |
| fantom3_9430008B02 | 1 | 5  | 5.00 |
| fantom3_6030499F11 | 3 | 15 | 5.00 |
| fantom3_A330013P14 | 2 | 10 | 5.00 |
| fantom3_A230069F06 | 2 | 10 | 5.00 |
| fantom3_4930429E23 | 2 | 10 | 5.00 |
| fantom3_D230036L12 | 1 | 5  | 5.00 |
| fantom3_A630025N14 | 1 | 5  | 5.00 |
| fantom3_F830225K24 | 1 | 5  | 5.00 |
| fantom3_A930008K18 | 1 | 5  | 5.00 |
| fantom3_D030003J18 | 1 | 5  | 5.00 |
| Gm4971             | 1 | 5  | 5.00 |
| fantom3_F830224B06 | 1 | 5  | 5.00 |
| fantom3_6720457D02 | 6 | 30 | 5.00 |
| fantom3_C430038G16 | 2 | 10 | 5.00 |
| fantom3_A730050L04 | 2 | 10 | 5.00 |
| fantom3_6430509L22 | 6 | 30 | 5.00 |
| fantom3_9830164F11 | 2 | 10 | 5.00 |
| fantom3_9330180A15 | 2 | 10 | 5.00 |
| fantom3_9430005B13 | 1 | 5  | 5.00 |
| 1600002D24Rik      | 1 | 5  | 5.00 |
| fantom3_A130022N18 | 1 | 5  | 5.00 |
| fantom3_1700084I05 | 1 | 5  | 5.00 |
| fantom3_A330015G07 | 1 | 5  | 5.00 |
| fantom3_B230398F15 | 1 | 5  | 5.00 |
| fantom3_F830225F22 | 1 | 5  | 5.00 |
| fantom3_F930035C23 | 6 | 30 | 5.00 |
| fantom3_E330011O21 | 2 | 10 | 5.00 |
| fantom3_D030074N24 | 1 | 5  | 5.00 |
| fantom3_A230024A21 | 1 | 5  | 5.00 |



|                    |      |       |      |
|--------------------|------|-------|------|
| fantom3_F830002H17 | 1    | 5     | 5.00 |
| fantom3_9930104O19 | 1    | 5     | 5.00 |
| fantom3_B930093C17 | 1    | 5     | 5.00 |
| fantom3_D930036L11 | 1    | 5     | 5.00 |
| fantom3_C030005P03 | 2    | 10    | 5.00 |
| fantom3_A430088I17 | 1    | 5     | 5.00 |
| fantom3_B230338A04 | 1    | 5     | 5.00 |
| 1700001J11Rik      | 1    | 5     | 5.00 |
| fantom3_C230077I18 | 1    | 5     | 5.00 |
| fantom3_9530085M16 | 1    | 5     | 5.00 |
| 4931408D14Rik      | 514  | 2540  | 4.94 |
| fantom3_9030411M13 | 72   | 355   | 4.93 |
| fantom3_A330042I21 | 10   | 49    | 4.90 |
| fantom3_7530419O16 | 891  | 4339  | 4.87 |
| fantom3_C730036B01 | 2542 | 12369 | 4.87 |
| fantom3_E330039K20 | 3437 | 16539 | 4.81 |
| Ces2d-ps           | 5    | 24    | 4.80 |
| fantom3_A530027J09 | 4    | 19    | 4.75 |
| fantom3_4930485C04 | 4    | 19    | 4.75 |
| fantom3_I1C0011F16 | 4    | 19    | 4.75 |
| fantom3_A230052H07 | 451  | 2133  | 4.73 |
| fantom3_G730001L10 | 3    | 14    | 4.67 |
| fantom3_E130116O09 | 3    | 14    | 4.67 |
| fantom3_G630045F12 | 3    | 14    | 4.67 |
| fantom3_9230112O09 | 3    | 14    | 4.67 |
| Gm1082             | 3    | 14    | 4.67 |
| fantom3_9430096M08 | 6    | 28    | 4.67 |
| fantom3_9630004F11 | 9    | 42    | 4.67 |
| fantom3_G730049H13 | 3    | 14    | 4.67 |
| fantom3_E030038B07 | 3    | 14    | 4.67 |
| 1700091H14Rik      | 6    | 28    | 4.67 |
| fantom3_D930030I03 | 3    | 14    | 4.67 |
| fantom3_D030016M01 | 3    | 14    | 4.67 |
| fantom3_D530008I22 | 3    | 14    | 4.67 |
| fantom3_D530031M14 | 3    | 14    | 4.67 |
| fantom3_I920021K10 | 3    | 14    | 4.67 |
| fantom3_E030047I21 | 6    | 28    | 4.67 |
| 4833422C13Rik      | 468  | 2153  | 4.60 |
| fantom3_1700073I01 | 5    | 23    | 4.60 |
| fantom3_A330096J11 | 1341 | 6076  | 4.53 |
| fantom3_C030047E05 | 1355 | 6132  | 4.53 |
| fantom3_C130058A18 | 2    | 9     | 4.50 |
| fantom3_A930014D11 | 2    | 9     | 4.50 |
| fantom3_6430705N15 | 2    | 9     | 4.50 |

|                    |   |    |      |
|--------------------|---|----|------|
| fantom3_A230061A22 | 2 | 9  | 4.50 |
| fantom3_C130025H16 | 2 | 9  | 4.50 |
| fantom3_E330001M20 | 2 | 9  | 4.50 |
| fantom3_9330197I21 | 2 | 9  | 4.50 |
| fantom3_A230004B05 | 2 | 9  | 4.50 |
| fantom3_3021401A05 | 2 | 9  | 4.50 |
| fantom3_2810040O04 | 2 | 9  | 4.50 |
| fantom3_F830033G06 | 4 | 18 | 4.50 |
| fantom3_A130090B19 | 4 | 18 | 4.50 |
| fantom3_C430017E22 | 2 | 9  | 4.50 |
| fantom3_9530025H10 | 2 | 9  | 4.50 |
| Emx2os             | 2 | 9  | 4.50 |
| fantom3_D030032E09 | 2 | 9  | 4.50 |
| fantom3_9330168K07 | 2 | 9  | 4.50 |
| fantom3_9330169L03 | 2 | 9  | 4.50 |
| fantom3_A130029F22 | 2 | 9  | 4.50 |
| fantom3_F830010P07 | 2 | 9  | 4.50 |
| fantom3_4930546E13 | 4 | 18 | 4.50 |
| 9230105E05Rik      | 2 | 9  | 4.50 |
| fantom3_9230105E05 | 2 | 9  | 4.50 |
| fantom3_7420445B05 | 2 | 9  | 4.50 |
| fantom3_A530065A10 | 2 | 9  | 4.50 |
| fantom3_C230047O04 | 2 | 9  | 4.50 |
| 4732490B19Rik      | 2 | 9  | 4.50 |
| fantom3_4732490B19 | 2 | 9  | 4.50 |
| fantom3_9630015L23 | 2 | 9  | 4.50 |
| fantom3_4930529E05 | 2 | 9  | 4.50 |
| fantom3_A530086I01 | 2 | 9  | 4.50 |
| fantom3_9430084D13 | 2 | 9  | 4.50 |
| fantom3_E330027H18 | 2 | 9  | 4.50 |
| fantom3_9630054E03 | 2 | 9  | 4.50 |
| fantom3_C130074J11 | 2 | 9  | 4.50 |
| fantom3_1500004F05 | 4 | 18 | 4.50 |
| fantom3_5730410D22 | 2 | 9  | 4.50 |
| fantom3_5830407L18 | 2 | 9  | 4.50 |
| fantom3_4930482A13 | 2 | 9  | 4.50 |
| fantom3_2310030G09 | 2 | 9  | 4.50 |
| fantom3_2310061I08 | 2 | 9  | 4.50 |
| fantom3_2610507D12 | 2 | 9  | 4.50 |
| fantom3_4932429E03 | 2 | 9  | 4.50 |
| fantom3_6430514B01 | 2 | 9  | 4.50 |
| fantom3_G630010F24 | 2 | 9  | 4.50 |
| fantom3_E330019F22 | 2 | 9  | 4.50 |
| fantom3_9430024N04 | 2 | 9  | 4.50 |

|                    |      |       |      |
|--------------------|------|-------|------|
| 4930552P12Rik      | 2    | 9     | 4.50 |
| fantom3_4930552P12 | 2    | 9     | 4.50 |
| fantom3_C630004G01 | 2    | 9     | 4.50 |
| fantom3_G830047P04 | 2    | 9     | 4.50 |
| fantom3_9630036L12 | 4    | 18    | 4.50 |
| fantom3_4930509B17 | 2    | 9     | 4.50 |
| fantom3_B930086C19 | 1526 | 6863  | 4.50 |
| Smim4              | 206  | 926   | 4.50 |
| fantom3_D830016K23 | 847  | 3806  | 4.49 |
| fantom3_4833422C13 | 476  | 2136  | 4.49 |
| fantom3_D230005N01 | 143  | 638   | 4.46 |
| 4833422C13Rik      | 490  | 2171  | 4.43 |
| fantom3_C130047M12 | 490  | 2171  | 4.43 |
| fantom3_B020022I17 | 7    | 31    | 4.43 |
| 4833422C13Rik      | 488  | 2153  | 4.41 |
| fantom3_2810490B19 | 158  | 690   | 4.37 |
| fantom3_D630039B14 | 529  | 2297  | 4.34 |
| 5730420D15Rik      | 3    | 13    | 4.33 |
| 5730420D15Rik      | 3    | 13    | 4.33 |
| fantom3_5730420D15 | 3    | 13    | 4.33 |
| fantom3_9530080J07 | 3    | 13    | 4.33 |
| fantom3_F630034G15 | 3    | 13    | 4.33 |
| fantom3_6330408M09 | 6    | 26    | 4.33 |
| fantom3_2900024J01 | 3    | 13    | 4.33 |
| fantom3_4930400K01 | 3    | 13    | 4.33 |
| fantom3_6430521D21 | 3    | 13    | 4.33 |
| fantom3_K530024H12 | 1759 | 7543  | 4.29 |
| fantom3_E530020L22 | 43   | 184   | 4.28 |
| fantom3_4933440K10 | 181  | 774   | 4.28 |
| fantom3_A430081H12 | 4    | 17    | 4.25 |
| fantom3_F430011H22 | 4    | 17    | 4.25 |
| fantom3_6430540J22 | 352  | 1496  | 4.25 |
| fantom3_1700031D16 | 182  | 768   | 4.22 |
| fantom3_D830027I06 | 5    | 21    | 4.20 |
| fantom3_9030425J09 | 5    | 21    | 4.20 |
| fantom3_1700023D08 | 6    | 25    | 4.17 |
| fantom3_E230020D19 | 12   | 50    | 4.17 |
| fantom3_6430573F11 | 103  | 429   | 4.17 |
| fantom3_2900053I11 | 4313 | 17919 | 4.15 |
| fantom3_D930037D01 | 7    | 29    | 4.14 |
| fantom3_C530032N24 | 7    | 29    | 4.14 |
| A730036I17Rik      | 15   | 62    | 4.13 |
| fantom3_C530042G19 | 24   | 99    | 4.13 |
| fantom3_4933433O05 | 60   | 247   | 4.12 |

|                    |      |      |      |
|--------------------|------|------|------|
| fantom3_A430075I01 | 9    | 37   | 4.11 |
| fantom3_6030460I07 | 1048 | 4301 | 4.10 |
| fantom3_D230002O22 | 27   | 110  | 4.07 |
| fantom3_4930537F08 | 57   | 232  | 4.07 |
| fantom3_F830218H22 | 46   | 186  | 4.04 |
| fantom3_9630061O09 | 1349 | 5452 | 4.04 |
| fantom3_7120433M01 | 4    | 16   | 4.00 |
| fantom3_C230015I20 | 3    | 12   | 4.00 |
| fantom3_C130061C17 | 2    | 8    | 4.00 |
| fantom3_4931432P07 | 2    | 8    | 4.00 |
| fantom3_B230219N15 | 2    | 8    | 4.00 |
| fantom3_C230086P21 | 2    | 8    | 4.00 |
| fantom3_9430090C22 | 2    | 8    | 4.00 |
| fantom3_A530063B08 | 2    | 8    | 4.00 |
| fantom3_B230342O18 | 2    | 8    | 4.00 |
| fantom3_E030020C05 | 2    | 8    | 4.00 |
| fantom3_6230416H20 | 2    | 8    | 4.00 |
| fantom3_A730080B08 | 2    | 8    | 4.00 |
| 2610016A17Rik      | 2    | 8    | 4.00 |
| fantom3_5031425L03 | 2    | 8    | 4.00 |
| fantom3_I1C0010J19 | 2    | 8    | 4.00 |
| fantom3_K530031M16 | 2    | 8    | 4.00 |
| fantom3_5830487J09 | 2    | 8    | 4.00 |
| fantom3_A830089E20 | 2    | 8    | 4.00 |
| fantom3_4732457O22 | 2    | 8    | 4.00 |
| fantom3_A630074D03 | 2    | 8    | 4.00 |
| fantom3_D430031M04 | 2    | 8    | 4.00 |
| fantom3_D430042D18 | 2    | 8    | 4.00 |
| fantom3_C820009N22 | 2    | 8    | 4.00 |
| fantom3_F730036O08 | 2    | 8    | 4.00 |
| fantom3_G630064G18 | 2    | 8    | 4.00 |
| fantom3_I0C0030B04 | 2    | 8    | 4.00 |
| fantom3_5830485H16 | 1    | 4    | 4.00 |
| fantom3_F830108J22 | 1    | 4    | 4.00 |
| fantom3_F830016M16 | 1    | 4    | 4.00 |
| fantom3_A630096B13 | 1    | 4    | 4.00 |
| A730018C14Rik      | 1    | 4    | 4.00 |
| fantom3_A530032D21 | 1    | 4    | 4.00 |
| fantom3_C130068F21 | 1    | 4    | 4.00 |
| fantom3_B930004P07 | 1    | 4    | 4.00 |
| fantom3_E330033O05 | 1    | 4    | 4.00 |
| fantom3_9330184M05 | 1    | 4    | 4.00 |
| fantom3_E230008B12 | 1    | 4    | 4.00 |
| 9430076G02Rik      | 1    | 4    | 4.00 |

|                    |   |    |      |
|--------------------|---|----|------|
| fantom3_6330512F01 | 1 | 4  | 4.00 |
| fantom3_A830060C21 | 1 | 4  | 4.00 |
| fantom3_C230073G23 | 1 | 4  | 4.00 |
| fantom3_9330166I03 | 1 | 4  | 4.00 |
| fantom3_9530039B13 | 1 | 4  | 4.00 |
| fantom3_A530056J20 | 1 | 4  | 4.00 |
| fantom3_A830048L15 | 1 | 4  | 4.00 |
| fantom3_C230060E24 | 1 | 4  | 4.00 |
| fantom3_5730419E21 | 1 | 4  | 4.00 |
| fantom3_6430525O13 | 1 | 4  | 4.00 |
| fantom3_A430073I07 | 1 | 4  | 4.00 |
| fantom3_F830205N24 | 1 | 4  | 4.00 |
| Gm1653             | 1 | 4  | 4.00 |
| Samd7              | 1 | 4  | 4.00 |
| fantom3_A330103E24 | 1 | 4  | 4.00 |
| fantom3_4632406I19 | 1 | 4  | 4.00 |
| fantom3_B020010K22 | 1 | 4  | 4.00 |
| fantom3_7630403E16 | 1 | 4  | 4.00 |
| fantom3_9630046P05 | 1 | 4  | 4.00 |
| fantom3_4933409J01 | 1 | 4  | 4.00 |
| fantom3_5730420B04 | 1 | 4  | 4.00 |
| fantom3_9930030C16 | 1 | 4  | 4.00 |
| fantom3_A330030O17 | 1 | 4  | 4.00 |
| fantom3_A330096P22 | 1 | 4  | 4.00 |
| fantom3_D130011M19 | 1 | 4  | 4.00 |
| fantom3_A530010L16 | 1 | 4  | 4.00 |
| fantom3_B020007E24 | 1 | 4  | 4.00 |
| fantom3_D930018I06 | 1 | 4  | 4.00 |
| 2900079G21Rik      | 1 | 4  | 4.00 |
| fantom3_A130086G18 | 1 | 4  | 4.00 |
| fantom3_8030444H21 | 1 | 4  | 4.00 |
| fantom3_E330016L19 | 6 | 24 | 4.00 |
| fantom3_9630026I09 | 7 | 28 | 4.00 |
| Gm20753            | 2 | 8  | 4.00 |
| fantom3_4930564M02 | 2 | 8  | 4.00 |
| fantom3_A530076I17 | 2 | 8  | 4.00 |
| fantom3_D030052P04 | 2 | 8  | 4.00 |
| fantom3_9330115I17 | 2 | 8  | 4.00 |
| fantom3_E430016M24 | 2 | 8  | 4.00 |
| fantom3_2310050J21 | 2 | 8  | 4.00 |
| fantom3_F830006J18 | 2 | 8  | 4.00 |
| fantom3_6330441F13 | 2 | 8  | 4.00 |
| fantom3_G630009M09 | 2 | 8  | 4.00 |
| fantom3_9530056P15 | 2 | 8  | 4.00 |

|                    |   |    |      |
|--------------------|---|----|------|
| fantom3_8030441J06 | 3 | 12 | 4.00 |
| fantom3_9930029D17 | 3 | 12 | 4.00 |
| fantom3_A630077E22 | 4 | 16 | 4.00 |
| fantom3_C530034L13 | 3 | 12 | 4.00 |
| Gm19589            | 2 | 8  | 4.00 |
| fantom3_6330571D19 | 2 | 8  | 4.00 |
| fantom3_9630056N24 | 2 | 8  | 4.00 |
| fantom3_F830205L19 | 2 | 8  | 4.00 |
| fantom3_9630023C09 | 2 | 8  | 4.00 |
| fantom3_A630014C17 | 2 | 8  | 4.00 |
| fantom3_6820406N23 | 2 | 8  | 4.00 |
| fantom3_B230206N20 | 2 | 8  | 4.00 |
| fantom3_9930028J18 | 2 | 8  | 4.00 |
| fantom3_A130032G04 | 2 | 8  | 4.00 |
| fantom3_D130047J24 | 2 | 8  | 4.00 |
| fantom3_F830022J18 | 2 | 8  | 4.00 |
| B230214G05Rik      | 2 | 8  | 4.00 |
| fantom3_B230214G05 | 2 | 8  | 4.00 |
| fantom3_D230007E15 | 2 | 8  | 4.00 |
| fantom3_F930017I12 | 2 | 8  | 4.00 |
| fantom3_D930017E24 | 2 | 8  | 4.00 |
| fantom3_4933425M03 | 2 | 8  | 4.00 |
| fantom3_B230334C09 | 2 | 8  | 4.00 |
| fantom3_4932433C14 | 2 | 8  | 4.00 |
| fantom3_D630036G19 | 2 | 8  | 4.00 |
| fantom3_B230111K12 | 2 | 8  | 4.00 |
| fantom3_F730319F13 | 2 | 8  | 4.00 |
| fantom3_F830111C14 | 2 | 8  | 4.00 |
| fantom3_K530016G10 | 2 | 8  | 4.00 |
| fantom3_A130044E20 | 2 | 8  | 4.00 |
| fantom3_4930448E06 | 2 | 8  | 4.00 |
| fantom3_E030015M07 | 2 | 8  | 4.00 |
| fantom3_5330427H03 | 1 | 4  | 4.00 |
| fantom3_4631419H05 | 1 | 4  | 4.00 |
| fantom3_B130006A19 | 1 | 4  | 4.00 |
| fantom3_C630039L13 | 1 | 4  | 4.00 |
| fantom3_1110031C17 | 1 | 4  | 4.00 |
| fantom3_A330034I05 | 1 | 4  | 4.00 |
| A630010A05Rik      | 1 | 4  | 4.00 |
| fantom3_C530030I12 | 1 | 4  | 4.00 |
| fantom3_2310042O12 | 1 | 4  | 4.00 |
| fantom3_E030019H01 | 1 | 4  | 4.00 |
| fantom3_C030015F15 | 1 | 4  | 4.00 |
| 4930467D21Rik      | 1 | 4  | 4.00 |

|                    |   |    |      |
|--------------------|---|----|------|
| fantom3_4930467D21 | 1 | 4  | 4.00 |
| fantom3_B020023H02 | 1 | 4  | 4.00 |
| fantom3_B830020B14 | 1 | 4  | 4.00 |
| fantom3_G530019J10 | 1 | 4  | 4.00 |
| E330023G01Rik      | 1 | 4  | 4.00 |
| fantom3_E330023G01 | 1 | 4  | 4.00 |
| fantom3_A430103D13 | 3 | 12 | 4.00 |
| fantom3_4930500E03 | 3 | 12 | 4.00 |
| fantom3_A130024J23 | 3 | 12 | 4.00 |
| 5930403L14Rik      | 4 | 16 | 4.00 |
| fantom3_6720470B12 | 2 | 8  | 4.00 |
| fantom3_G430072D06 | 2 | 8  | 4.00 |
| fantom3_4833422M11 | 2 | 8  | 4.00 |
| fantom3_C920004C22 | 2 | 8  | 4.00 |
| Nespas             | 2 | 8  | 4.00 |
| fantom3_F730207D02 | 2 | 8  | 4.00 |
| fantom3_A230044A06 | 2 | 8  | 4.00 |
| fantom3_K230018F12 | 2 | 8  | 4.00 |
| fantom3_B020011M09 | 2 | 8  | 4.00 |
| fantom3_B020023E12 | 2 | 8  | 4.00 |
| fantom3_9530019H20 | 2 | 8  | 4.00 |
| fantom3_B930089I02 | 4 | 16 | 4.00 |
| fantom3_E330008E06 | 4 | 16 | 4.00 |
| fantom3_A630076J08 | 6 | 24 | 4.00 |
| fantom3_7120492D10 | 4 | 16 | 4.00 |
| fantom3_C130040C23 | 2 | 8  | 4.00 |
| fantom3_C230099D08 | 2 | 8  | 4.00 |
| fantom3_9530074I05 | 2 | 8  | 4.00 |
| fantom3_E130110J20 | 2 | 8  | 4.00 |
| fantom3_D930013K24 | 2 | 8  | 4.00 |
| fantom3_E130303A22 | 2 | 8  | 4.00 |
| fantom3_F830207A08 | 2 | 8  | 4.00 |
| fantom3_9430073I07 | 2 | 8  | 4.00 |
| fantom3_F730014L09 | 2 | 8  | 4.00 |
| fantom3_0710007A08 | 2 | 8  | 4.00 |
| fantom3_C230063K18 | 2 | 8  | 4.00 |
| fantom3_A730019A13 | 1 | 4  | 4.00 |
| fantom3_K530010N24 | 1 | 4  | 4.00 |
| fantom3_D230013D19 | 1 | 4  | 4.00 |
| fantom3_D930017N05 | 1 | 4  | 4.00 |
| fantom3_E130113D07 | 1 | 4  | 4.00 |
| fantom3_D930012K20 | 1 | 4  | 4.00 |
| fantom3_F430111C12 | 1 | 4  | 4.00 |
| fantom3_A530046N01 | 1 | 4  | 4.00 |

|                    |   |    |      |
|--------------------|---|----|------|
| fantom3_C230094P08 | 1 | 4  | 4.00 |
| fantom3_D630015I18 | 1 | 4  | 4.00 |
| Gm6623             | 1 | 4  | 4.00 |
| fantom3_4631411J20 | 1 | 4  | 4.00 |
| fantom3_A330043A11 | 1 | 4  | 4.00 |
| fantom3_D230032A15 | 1 | 4  | 4.00 |
| fantom3_6430605H24 | 1 | 4  | 4.00 |
| fantom3_A230102G17 | 1 | 4  | 4.00 |
| fantom3_C230001G10 | 1 | 4  | 4.00 |
| fantom3_5730410C11 | 1 | 4  | 4.00 |
| fantom3_A230073C10 | 1 | 4  | 4.00 |
| fantom3_A430106C03 | 1 | 4  | 4.00 |
| Vax2os             | 1 | 4  | 4.00 |
| fantom3_1700020M01 | 1 | 4  | 4.00 |
| fantom3_4930433G11 | 1 | 4  | 4.00 |
| fantom3_6720473I03 | 1 | 4  | 4.00 |
| fantom3_A230097C02 | 1 | 4  | 4.00 |
| fantom3_A730071F05 | 1 | 4  | 4.00 |
| fantom3_C030019G06 | 1 | 4  | 4.00 |
| fantom3_6430523M17 | 1 | 4  | 4.00 |
| fantom3_D130099D04 | 1 | 4  | 4.00 |
| fantom3_2900011F02 | 1 | 4  | 4.00 |
| fantom3_9030602I02 | 6 | 24 | 4.00 |
| fantom3_4732457O16 | 6 | 24 | 4.00 |
| fantom3_C530045J11 | 4 | 16 | 4.00 |
| fantom3_9530060I07 | 2 | 8  | 4.00 |
| fantom3_A230058M14 | 2 | 8  | 4.00 |
| fantom3_D130061K21 | 2 | 8  | 4.00 |
| fantom3_9830103F04 | 2 | 8  | 4.00 |
| fantom3_1110012J17 | 2 | 8  | 4.00 |
| fantom3_9330109P18 | 2 | 8  | 4.00 |
| fantom3_A130002P08 | 2 | 8  | 4.00 |
| fantom3_D230019N10 | 2 | 8  | 4.00 |
| fantom3_7420463M02 | 2 | 8  | 4.00 |
| fantom3_4931406G05 | 3 | 12 | 4.00 |
| fantom3_B930032K05 | 2 | 8  | 4.00 |
| fantom3_8030495O19 | 2 | 8  | 4.00 |
| fantom3_A430040D18 | 2 | 8  | 4.00 |
| fantom3_C230078I21 | 2 | 8  | 4.00 |
| fantom3_D930016G20 | 2 | 8  | 4.00 |
| AI414108           | 2 | 8  | 4.00 |
| fantom3_5330434N09 | 1 | 4  | 4.00 |
| fantom3_7420404I10 | 1 | 4  | 4.00 |
| fantom3_A730099G24 | 1 | 4  | 4.00 |



|                    |   |    |      |
|--------------------|---|----|------|
| F630206G17Rik      | 1 | 4  | 4.00 |
| fantom3_2810442I21 | 1 | 4  | 4.00 |
| fantom3_2900016I12 | 1 | 4  | 4.00 |
| fantom3_2900060N18 | 1 | 4  | 4.00 |
| fantom3_F630022K16 | 1 | 4  | 4.00 |
| fantom3_F630206G17 | 1 | 4  | 4.00 |
| 2310005E17Rik      | 1 | 4  | 4.00 |
| fantom3_2310005E17 | 1 | 4  | 4.00 |
| fantom3_D930023B19 | 1 | 4  | 4.00 |
| fantom3_A230050E13 | 1 | 4  | 4.00 |
| fantom3_2210409C20 | 1 | 4  | 4.00 |
| fantom3_4930534A14 | 1 | 4  | 4.00 |
| fantom3_B230333H05 | 1 | 4  | 4.00 |
| fantom3_B930012P20 | 1 | 4  | 4.00 |
| fantom3_A930031H19 | 1 | 4  | 4.00 |
| fantom3_D130008P17 | 1 | 4  | 4.00 |
| fantom3_4930512O11 | 1 | 4  | 4.00 |
| fantom3_0610042B23 | 1 | 4  | 4.00 |
| fantom3_1110032P03 | 1 | 4  | 4.00 |
| fantom3_D930029H23 | 1 | 4  | 4.00 |
| fantom3_G630024A14 | 1 | 4  | 4.00 |
| fantom3_4933436I20 | 4 | 16 | 4.00 |
| fantom3_C730026P17 | 4 | 16 | 4.00 |
| fantom3_B230308O18 | 2 | 8  | 4.00 |
| fantom3_B230313A11 | 2 | 8  | 4.00 |
| fantom3_K530044I24 | 2 | 8  | 4.00 |
| fantom3_B930060O04 | 2 | 8  | 4.00 |
| fantom3_9630019D09 | 3 | 12 | 4.00 |
| fantom3_A230016M02 | 5 | 20 | 4.00 |
| fantom3_6030405F07 | 4 | 16 | 4.00 |
| fantom3_6720454F05 | 2 | 8  | 4.00 |
| fantom3_4932408N12 | 2 | 8  | 4.00 |
| fantom3_A130028J07 | 2 | 8  | 4.00 |
| fantom3_C130007F22 | 2 | 8  | 4.00 |
| fantom3_2310024F14 | 2 | 8  | 4.00 |
| fantom3_9430012N08 | 1 | 4  | 4.00 |
| fantom3_B930013C23 | 1 | 4  | 4.00 |
| fantom3_G130201G04 | 1 | 4  | 4.00 |
| fantom3_A230081B03 | 1 | 4  | 4.00 |
| fantom3_4930540G21 | 1 | 4  | 4.00 |
| 4930471C04Rik      | 1 | 4  | 4.00 |
| fantom3_4930471C04 | 1 | 4  | 4.00 |
| fantom3_E130102J01 | 1 | 4  | 4.00 |
| fantom3_A730014L24 | 1 | 4  | 4.00 |

|                    |      |       |      |
|--------------------|------|-------|------|
| fantom3_D130069E17 | 1    | 4     | 4.00 |
| fantom3_4930583K21 | 1    | 4     | 4.00 |
| fantom3_9430044O05 | 1    | 4     | 4.00 |
| fantom3_E030018C24 | 1    | 4     | 4.00 |
| fantom3_C230084I20 | 2    | 8     | 4.00 |
| fantom3_9030614I24 | 2    | 8     | 4.00 |
| D630045M09Rik      | 3    | 12    | 4.00 |
| fantom3_0610012K18 | 2    | 8     | 4.00 |
| fantom3_6430591O13 | 2    | 8     | 4.00 |
| fantom3_D230034L24 | 1    | 4     | 4.00 |
| fantom3_7120444A08 | 1    | 4     | 4.00 |
| fantom3_4732435N08 | 1    | 4     | 4.00 |
| fantom3_B130014L21 | 1    | 4     | 4.00 |
| fantom3_A530096P14 | 2    | 8     | 4.00 |
| fantom3_D630045M09 | 2    | 8     | 4.00 |
| fantom3_G630004E22 | 1    | 4     | 4.00 |
| fantom3_B230347B12 | 1    | 4     | 4.00 |
| Zim3               | 1    | 4     | 4.00 |
| fantom3_9530019A01 | 2    | 8     | 4.00 |
| fantom3_A130091D23 | 1    | 4     | 4.00 |
| I730030J21Rik      | 1    | 4     | 4.00 |
| 5730422E09Rik      | 1    | 4     | 4.00 |
| fantom3_E330040K20 | 1    | 4     | 4.00 |
| fantom3_2900006B19 | 4    | 16    | 4.00 |
| fantom3_B020030O10 | 2    | 8     | 4.00 |
| fantom3_2900074L10 | 11   | 44    | 4.00 |
| fantom3_B230209O05 | 1    | 4     | 4.00 |
| fantom3_8030487O14 | 1    | 4     | 4.00 |
| fantom3_4732455F06 | 2    | 8     | 4.00 |
| fantom3_C230003P19 | 1    | 4     | 4.00 |
| fantom3_E430008K20 | 4135 | 16337 | 3.95 |
| E330011O21Rik      | 30   | 118   | 3.93 |
| Eci2               | 3939 | 15409 | 3.91 |
| Gm13845            | 8    | 31    | 3.88 |
| fantom3_2700016F22 | 7    | 27    | 3.86 |
| fantom3_B130005E17 | 7    | 27    | 3.86 |
| fantom3_A830040F21 | 7    | 27    | 3.86 |
| fantom3_B230367P07 | 13   | 50    | 3.85 |
| Marcks11-ps4       | 88   | 338   | 3.84 |
| fantom3_B730047E09 | 6    | 23    | 3.83 |
| fantom3_8030487P14 | 6    | 23    | 3.83 |
| fantom3_C230011H18 | 6    | 23    | 3.83 |
| fantom3_4732482G11 | 168  | 644   | 3.83 |
| fantom3_2310004G06 | 207  | 791   | 3.82 |

|                    |     |      |      |
|--------------------|-----|------|------|
| fantom3_C130047P17 | 5   | 19   | 3.80 |
| fantom3_A430052O14 | 5   | 19   | 3.80 |
| fantom3_E030030M11 | 10  | 38   | 3.80 |
| fantom3_B130052D06 | 5   | 19   | 3.80 |
| fantom3_9930027L19 | 15  | 57   | 3.80 |
| fantom3_C630028N24 | 644 | 2427 | 3.77 |
| fantom3_D330005P14 | 25  | 94   | 3.76 |
| fantom3_D530027M21 | 4   | 15   | 3.75 |
| fantom3_A630033B20 | 4   | 15   | 3.75 |
| fantom3_A430108I23 | 4   | 15   | 3.75 |
| fantom3_7120455F01 | 4   | 15   | 3.75 |
| fantom3_1190006G21 | 4   | 15   | 3.75 |
| fantom3_B230215B20 | 12  | 45   | 3.75 |
| fantom3_4631413D02 | 4   | 15   | 3.75 |
| fantom3_F830035K10 | 4   | 15   | 3.75 |
| fantom3_F830034M11 | 12  | 45   | 3.75 |
| fantom3_4930442N21 | 4   | 15   | 3.75 |
| fantom3_E330013L06 | 4   | 15   | 3.75 |
| Gm13315            | 4   | 15   | 3.75 |
| fantom3_C130030M18 | 4   | 15   | 3.75 |
| Gm16157            | 123 | 461  | 3.75 |
| fantom3_E030006J08 | 30  | 112  | 3.73 |
| fantom3_6030437L03 | 10  | 37   | 3.70 |
| fantom3_9330128J06 | 678 | 2495 | 3.68 |
| Gm10768            | 900 | 3305 | 3.67 |
| fantom3_E030041I08 | 355 | 1303 | 3.67 |
| 2310069G16Rik      | 3   | 11   | 3.67 |
| fantom3_4732420M22 | 3   | 11   | 3.67 |
| fantom3_A530058N18 | 3   | 11   | 3.67 |
| fantom3_4930520I17 | 3   | 11   | 3.67 |
| fantom3_2410005N02 | 3   | 11   | 3.67 |
| fantom3_E230017D19 | 3   | 11   | 3.67 |
| fantom3_C130041M12 | 6   | 22   | 3.67 |
| fantom3_4833442F11 | 3   | 11   | 3.67 |
| fantom3_C530045K13 | 3   | 11   | 3.67 |
| fantom3_D330040M08 | 3   | 11   | 3.67 |
| 2810442I21Rik      | 3   | 11   | 3.67 |
| fantom3_6430576B06 | 3   | 11   | 3.67 |
| fantom3_F830006K17 | 3   | 11   | 3.67 |
| fantom3_F630024E08 | 3   | 11   | 3.67 |
| fantom3_F630019C12 | 3   | 11   | 3.67 |
| fantom3_C530035F08 | 3   | 11   | 3.67 |
| fantom3_G630036P13 | 74  | 270  | 3.65 |
| fantom3_7230401N02 | 8   | 29   | 3.63 |

|                    |      |       |      |
|--------------------|------|-------|------|
| fantom3_D830040G08 | 5    | 18    | 3.60 |
| fantom3_A130029O22 | 5    | 18    | 3.60 |
| fantom3_G530006K04 | 5    | 18    | 3.60 |
| fantom3_G530145B22 | 5    | 18    | 3.60 |
| fantom3_B230330H24 | 5    | 18    | 3.60 |
| fantom3_A230049N09 | 200  | 719   | 3.60 |
| 0610040B10Rik      | 19   | 68    | 3.58 |
| fantom3_2310034A14 | 19   | 68    | 3.58 |
| fantom3_C030003J12 | 7    | 25    | 3.57 |
| fantom3_2700007L21 | 959  | 3419  | 3.57 |
| fantom3_C730003K16 | 7775 | 27622 | 3.55 |
| fantom3_9230106B05 | 13   | 46    | 3.54 |
| fantom3_2410041F14 | 236  | 831   | 3.52 |
| fantom3_I830129C17 | 4480 | 15767 | 3.52 |
| fantom3_F630116G07 | 4    | 14    | 3.50 |
| fantom3_A230022H13 | 4    | 14    | 3.50 |
| fantom3_A530053M12 | 2    | 7     | 3.50 |
| Gm5177             | 2    | 7     | 3.50 |
| B020018J22Rik      | 2    | 7     | 3.50 |
| fantom3_B020018J22 | 2    | 7     | 3.50 |
| fantom3_D230005K10 | 2    | 7     | 3.50 |
| fantom3_4930428F12 | 2    | 7     | 3.50 |
| fantom3_7120498O09 | 2    | 7     | 3.50 |
| fantom3_2610016A17 | 2    | 7     | 3.50 |
| fantom3_A430013M15 | 2    | 7     | 3.50 |
| Gm5547             | 2    | 7     | 3.50 |
| fantom3_9630001P10 | 2    | 7     | 3.50 |
| fantom3_B230037B17 | 2    | 7     | 3.50 |
| fantom3_A730007E21 | 2    | 7     | 3.50 |
| fantom3_B230204M08 | 2    | 7     | 3.50 |
| fantom3_C230060D03 | 2    | 7     | 3.50 |
| fantom3_F730222I11 | 2    | 7     | 3.50 |
| fantom3_4932410E14 | 4    | 14    | 3.50 |
| fantom3_C030014O09 | 4    | 14    | 3.50 |
| fantom3_B930034P18 | 2    | 7     | 3.50 |
| fantom3_F630040K05 | 2    | 7     | 3.50 |
| fantom3_B930016E20 | 2    | 7     | 3.50 |
| fantom3_1600017P15 | 2    | 7     | 3.50 |
| fantom3_D230034E19 | 2    | 7     | 3.50 |
| fantom3_9230028E05 | 2    | 7     | 3.50 |
| fantom3_F830035A15 | 2    | 7     | 3.50 |
| fantom3_4933431K03 | 2    | 7     | 3.50 |
| fantom3_8030461E11 | 4    | 14    | 3.50 |
| fantom3_A530045O15 | 10   | 35    | 3.50 |

|                    |    |     |      |
|--------------------|----|-----|------|
| fantom3_G730045L09 | 6  | 21  | 3.50 |
| fantom3_4933439K20 | 2  | 7   | 3.50 |
| fantom3_9630037A12 | 2  | 7   | 3.50 |
| fantom3_9230108N11 | 2  | 7   | 3.50 |
| fantom3_9930004D09 | 2  | 7   | 3.50 |
| fantom3_C230074K04 | 2  | 7   | 3.50 |
| fantom3_9630032A21 | 2  | 7   | 3.50 |
| fantom3_A130035E13 | 2  | 7   | 3.50 |
| fantom3_A230046L02 | 2  | 7   | 3.50 |
| fantom3_4930414F18 | 2  | 7   | 3.50 |
| fantom3_K530005H07 | 2  | 7   | 3.50 |
| fantom3_A630046B08 | 2  | 7   | 3.50 |
| fantom3_4930516I09 | 2  | 7   | 3.50 |
| fantom3_A130051P19 | 2  | 7   | 3.50 |
| fantom3_9330010F12 | 2  | 7   | 3.50 |
| fantom3_B230380C22 | 2  | 7   | 3.50 |
| fantom3_F830007A09 | 2  | 7   | 3.50 |
| fantom3_9630039A02 | 2  | 7   | 3.50 |
| fantom3_B930002O17 | 2  | 7   | 3.50 |
| fantom3_2610312K03 | 2  | 7   | 3.50 |
| fantom3_A130074A05 | 2  | 7   | 3.50 |
| fantom3_6720458L19 | 2  | 7   | 3.50 |
| fantom3_C230084O20 | 2  | 7   | 3.50 |
| fantom3_A130004F19 | 4  | 14  | 3.50 |
| fantom3_C630001C05 | 4  | 14  | 3.50 |
| fantom3_B430210J15 | 4  | 14  | 3.50 |
| fantom3_D930040D23 | 4  | 14  | 3.50 |
| fantom3_4732420C16 | 2  | 7   | 3.50 |
| fantom3_4921520D11 | 2  | 7   | 3.50 |
| fantom3_A730008F11 | 2  | 7   | 3.50 |
| fantom3_C230045J03 | 2  | 7   | 3.50 |
| 9330159M07Rik      | 30 | 105 | 3.50 |
| fantom3_2610028M16 | 8  | 28  | 3.50 |
| fantom3_F830112B07 | 4  | 14  | 3.50 |
| fantom3_B930011K02 | 10 | 35  | 3.50 |
| fantom3_4832418E19 | 8  | 28  | 3.50 |
| fantom3_C230059E23 | 4  | 14  | 3.50 |
| fantom3_5730408A14 | 2  | 7   | 3.50 |
| fantom3_A430069B06 | 2  | 7   | 3.50 |
| fantom3_A930002L11 | 2  | 7   | 3.50 |
| fantom3_E030013C19 | 2  | 7   | 3.50 |
| fantom3_E230035I03 | 2  | 7   | 3.50 |
| fantom3_B230345L09 | 2  | 7   | 3.50 |
| fantom3_G830038H18 | 2  | 7   | 3.50 |

|                    |   |    |      |
|--------------------|---|----|------|
| 1700120C14Rik      | 2 | 7  | 3.50 |
| fantom3_1700120C14 | 2 | 7  | 3.50 |
| fantom3_D130045L18 | 2 | 7  | 3.50 |
| fantom3_D730003G15 | 2 | 7  | 3.50 |
| fantom3_A830011E02 | 2 | 7  | 3.50 |
| fantom3_F830110L06 | 2 | 7  | 3.50 |
| fantom3_8430438M01 | 2 | 7  | 3.50 |
| fantom3_4932703L18 | 2 | 7  | 3.50 |
| fantom3_D130006C22 | 2 | 7  | 3.50 |
| fantom3_4931433I17 | 2 | 7  | 3.50 |
| fantom3_G630005F21 | 2 | 7  | 3.50 |
| fantom3_D430030D24 | 2 | 7  | 3.50 |
| fantom3_1700007F02 | 8 | 28 | 3.50 |
| fantom3_2900089D17 | 4 | 14 | 3.50 |
| fantom3_2900090N03 | 4 | 14 | 3.50 |
| fantom3_E030038F08 | 2 | 7  | 3.50 |
| fantom3_C230035M14 | 2 | 7  | 3.50 |
| fantom3_4932701E15 | 2 | 7  | 3.50 |
| fantom3_I0C0009L23 | 2 | 7  | 3.50 |
| fantom3_A830011K09 | 2 | 7  | 3.50 |
| fantom3_4833431P16 | 6 | 21 | 3.50 |
| fantom3_9830142N19 | 4 | 14 | 3.50 |
| fantom3_4930485B16 | 2 | 7  | 3.50 |
| fantom3_G730039K21 | 2 | 7  | 3.50 |
| fantom3_D230015L17 | 2 | 7  | 3.50 |
| fantom3_B930031P11 | 2 | 7  | 3.50 |
| 4930412O13Rik      | 2 | 7  | 3.50 |
| fantom3_D830038L22 | 2 | 7  | 3.50 |
| fantom3_8030437L22 | 4 | 14 | 3.50 |
| fantom3_B230343M05 | 4 | 14 | 3.50 |
| fantom3_C030004G18 | 2 | 7  | 3.50 |
| fantom3_6430542D16 | 2 | 7  | 3.50 |
| fantom3_4930421P22 | 2 | 7  | 3.50 |
| fantom3_1700048O20 | 4 | 14 | 3.50 |
| fantom3_A730068O03 | 2 | 7  | 3.50 |
| 1700095A21Rik      | 2 | 7  | 3.50 |
| fantom3_1700095A21 | 2 | 7  | 3.50 |
| fantom3_9330118A15 | 2 | 7  | 3.50 |
| fantom3_B230369O13 | 2 | 7  | 3.50 |
| fantom3_3110047P20 | 2 | 7  | 3.50 |
| fantom3_C920018K02 | 2 | 7  | 3.50 |
| fantom3_D630044B14 | 2 | 7  | 3.50 |
| fantom3_F730014G11 | 2 | 7  | 3.50 |
| fantom3_9430089F21 | 2 | 7  | 3.50 |

|                    |      |      |      |
|--------------------|------|------|------|
| fantom3_4930579H01 | 4    | 14   | 3.50 |
| Cd1d2              | 2    | 7    | 3.50 |
| fantom3_F630036E10 | 2    | 7    | 3.50 |
| fantom3_4930579P19 | 2    | 7    | 3.50 |
| fantom3_A230062O07 | 2    | 7    | 3.50 |
| fantom3_0610040B10 | 19   | 66   | 3.47 |
| fantom3_A530094K13 | 77   | 267  | 3.47 |
| fantom3_E230021K14 | 43   | 149  | 3.47 |
| fantom3_G830028C15 | 11   | 38   | 3.45 |
| fantom3_9330159M07 | 9    | 31   | 3.44 |
| fantom3_C630001G20 | 7    | 24   | 3.43 |
| fantom3_9630026O22 | 19   | 65   | 3.42 |
| 9330159M07Rik      | 36   | 123  | 3.42 |
| fantom3_A930002N16 | 29   | 99   | 3.41 |
| fantom3_4831430G22 | 51   | 174  | 3.41 |
| fantom3_D930024E14 | 37   | 126  | 3.41 |
| fantom3_F830006A19 | 5    | 17   | 3.40 |
| fantom3_4930568L21 | 5    | 17   | 3.40 |
| fantom3_A130034K24 | 5    | 17   | 3.40 |
| fantom3_D330042P04 | 5    | 17   | 3.40 |
| fantom3_B430109A22 | 1271 | 4310 | 3.39 |
| fantom3_C130051K14 | 27   | 91   | 3.37 |
| fantom3_2810425J22 | 521  | 1752 | 3.36 |
| fantom3_9430037G07 | 213  | 712  | 3.34 |
| fantom3_1700101I11 | 320  | 1067 | 3.33 |
| 1700101I11Rik      | 341  | 1137 | 3.33 |
| fantom3_4930459L24 | 341  | 1137 | 3.33 |
| fantom3_9530022G22 | 3    | 10   | 3.33 |
| fantom3_7120434M08 | 3    | 10   | 3.33 |
| fantom3_A630059D20 | 3    | 10   | 3.33 |
| fantom3_D030029K08 | 3    | 10   | 3.33 |
| Hmgb1-rs17         | 3    | 10   | 3.33 |
| fantom3_D030053I05 | 6    | 20   | 3.33 |
| fantom3_C230015N21 | 6    | 20   | 3.33 |
| fantom3_A130083J18 | 6    | 20   | 3.33 |
| A630020A06         | 3    | 10   | 3.33 |
| fantom3_A630020A06 | 3    | 10   | 3.33 |
| fantom3_C130090B16 | 3    | 10   | 3.33 |
| fantom3_9330121K16 | 3    | 10   | 3.33 |
| fantom3_D730012J16 | 15   | 50   | 3.33 |
| fantom3_F830114M07 | 9    | 30   | 3.33 |
| fantom3_6430508I04 | 6    | 20   | 3.33 |
| fantom3_A830097D02 | 3    | 10   | 3.33 |
| fantom3_5930428D04 | 3    | 10   | 3.33 |

|                    |      |       |      |
|--------------------|------|-------|------|
| fantom3_D430027E22 | 3    | 10    | 3.33 |
| fantom3_E130011N22 | 3    | 10    | 3.33 |
| fantom3_9330020O03 | 3    | 10    | 3.33 |
| fantom3_B230341L24 | 3    | 10    | 3.33 |
| fantom3_C230056N09 | 6    | 20    | 3.33 |
| 2700046A07Rik      | 3    | 10    | 3.33 |
| fantom3_2610202E01 | 3    | 10    | 3.33 |
| fantom3_I1C0019N16 | 15   | 50    | 3.33 |
| fantom3_A830047E08 | 15   | 50    | 3.33 |
| fantom3_4832402I06 | 3    | 10    | 3.33 |
| fantom3_4931406K07 | 3    | 10    | 3.33 |
| fantom3_A530052C14 | 3    | 10    | 3.33 |
| fantom3_C230035I16 | 3    | 10    | 3.33 |
| fantom3_F630113E18 | 6    | 20    | 3.33 |
| 9430037G07Rik      | 170  | 566   | 3.33 |
| fantom3_9530014F03 | 998  | 3316  | 3.32 |
| fantom3_4933428M03 | 13   | 43    | 3.31 |
| fantom3_A230068F22 | 7423 | 24462 | 3.30 |
| fantom3_A630023G13 | 7    | 23    | 3.29 |
| fantom3_5730527A11 | 7    | 23    | 3.29 |
| fantom3_A730048J02 | 7    | 23    | 3.29 |
| 1700061I17Rik      | 7    | 23    | 3.29 |
| B230378P21Rik      | 7    | 23    | 3.29 |
| fantom3_2610511G02 | 1880 | 6175  | 3.28 |
| Pnpla2             | 535  | 1753  | 3.28 |
| fantom3_B230317N08 | 29   | 95    | 3.28 |
| fantom3_D430011M04 | 11   | 36    | 3.27 |
| fantom3_F830222M02 | 15   | 49    | 3.27 |
| fantom3_4930423K06 | 985  | 3217  | 3.27 |
| fantom3_A130035H13 | 4    | 13    | 3.25 |
| fantom3_9830145C14 | 4    | 13    | 3.25 |
| fantom3_D030035M16 | 8    | 26    | 3.25 |
| fantom3_D830012D17 | 4    | 13    | 3.25 |
| fantom3_G730018I03 | 4    | 13    | 3.25 |
| fantom3_A530046N15 | 4    | 13    | 3.25 |
| fantom3_D430040I23 | 4    | 13    | 3.25 |
| fantom3_C230067O04 | 4    | 13    | 3.25 |
| fantom3_7120443J16 | 4    | 13    | 3.25 |
| fantom3_6820419D04 | 4    | 13    | 3.25 |
| fantom3_F930002H20 | 4    | 13    | 3.25 |
| fantom3_D330001C11 | 4    | 13    | 3.25 |
| fantom3_D030042F20 | 4    | 13    | 3.25 |
| fantom3_C430019L13 | 4    | 13    | 3.25 |
| Gm2381             | 4    | 13    | 3.25 |



|                    |      |      |      |
|--------------------|------|------|------|
| fantom3_6820417N05 | 16   | 52   | 3.25 |
| fantom3_D430002C08 | 8    | 26   | 3.25 |
| fantom3_9230118L13 | 4    | 13   | 3.25 |
| fantom3_C130081L23 | 4    | 13   | 3.25 |
| fantom3_E330001N03 | 14   | 45   | 3.21 |
| fantom3_4933424M13 | 29   | 93   | 3.21 |
| fantom3_A330041N07 | 5    | 16   | 3.20 |
| fantom3_4930414L22 | 10   | 32   | 3.20 |
| fantom3_1810016H11 | 10   | 32   | 3.20 |
| Speer7-ps1         | 5    | 16   | 3.20 |
| fantom3_F930007C13 | 5    | 16   | 3.20 |
| fantom3_C430017A15 | 5    | 16   | 3.20 |
| fantom3_D130027A10 | 5    | 16   | 3.20 |
| fantom3_C130012C08 | 5    | 16   | 3.20 |
| fantom3_D930029A21 | 1064 | 3394 | 3.19 |
| 2410006H16Rik      | 198  | 630  | 3.18 |
| fantom3_2410006H16 | 198  | 630  | 3.18 |
| fantom3_F830032I09 | 6    | 19   | 3.17 |
| fantom3_E130001G03 | 6    | 19   | 3.17 |
| C330024D21Rik      | 6    | 19   | 3.17 |
| fantom3_C330024D21 | 6    | 19   | 3.17 |
| fantom3_B230311A21 | 6    | 19   | 3.17 |
| Gm5086             | 6    | 19   | 3.17 |
| fantom3_1700127G21 | 13   | 41   | 3.15 |
| fantom3_D730031K04 | 27   | 85   | 3.15 |
| fantom3_A630052D18 | 14   | 44   | 3.14 |
| fantom3_9430039L02 | 7    | 22   | 3.14 |
| fantom3_3010019M01 | 14   | 44   | 3.14 |
| fantom3_9030408J19 | 105  | 330  | 3.14 |
| fantom3_C730004M04 | 198  | 621  | 3.14 |
| Gm16157            | 198  | 621  | 3.14 |
| fantom3_A830046I07 | 8    | 25   | 3.13 |
| fantom3_B020011F16 | 8    | 25   | 3.13 |
| fantom3_1110032G03 | 518  | 1614 | 3.12 |
| fantom3_E860011M11 | 9    | 28   | 3.11 |
| fantom3_F830212J09 | 9    | 28   | 3.11 |
| fantom3_F830002N21 | 9    | 28   | 3.11 |
| 1300015D01Rik      | 145  | 451  | 3.11 |
| fantom3_1300015D01 | 145  | 451  | 3.11 |
| fantom3_9430025K05 | 131  | 406  | 3.10 |
| fantom3_E230021E14 | 178  | 551  | 3.10 |
| fantom3_9330186E03 | 557  | 1724 | 3.10 |
| fantom3_2900046P06 | 24   | 74   | 3.08 |
| fantom3_E330001G02 | 16   | 49   | 3.06 |

|                    |      |       |      |
|--------------------|------|-------|------|
| fantom3_F830118O04 | 16   | 49    | 3.06 |
| fantom3_F830003M21 | 66   | 202   | 3.06 |
| fantom3_6430530M09 | 38   | 116   | 3.05 |
| Ppargc1a           | 198  | 603   | 3.05 |
| Hgd                | 9625 | 29097 | 3.02 |

---

**Supplemental Table S3. Sequences of primers and siRNAs.**

|                   | <b>Sequences</b>                                             | <b>Application</b> |
|-------------------|--------------------------------------------------------------|--------------------|
| Gm15441           | F : GAGAAAGAGCCCACCCGATA<br>R: AGAGATGGCTTGGTGGTTGA          | qPCR               |
| 4833411C07Rik     | F: TGACTIONAAGGACCCAGTGCC<br>R: ATGGGATCTGAGGTTGGGTG         | qPCR               |
| Gm10768           | F: TGTTTTACCTGCACGCACAT<br>R: GGCACCAAGGTTAAGAGCAC           | qPCR               |
| 4931408D14Rik     | F: ACTGAGCCACTGACTTCTCC<br>R: TGGACCTGTACTGGCTCAAG           | qPCR               |
| <i>Pepck</i>      | F: CATATGCTGATCCTGGGCATAAC<br>R: CAAACTTCATCCAGGCAATGTC      | qPCR               |
| <i>G6pase</i>     | F: TGGTAGCCCTGTCTTTCTTTG<br>R: TTCCAGCATTACACTTTCT           | qPCR               |
| <i>Acc1</i>       | F: GCCTCTTCCTGACAAACGAG<br>R: GCCGAAACATCTCTGGGATA           | qPCR               |
| <i>Fasn</i>       | F: TCCTGGAACGAGAACACGATCT<br>R: GAGACGTGTCACCTCCTGGACTTG     | qPCR               |
| <i>Abcc2</i>      | F: GTGTGGATTCCCTTGGGCTTT<br>R: CACAACGAACACCTGCTTGG          | qPCR               |
| <i>Atf4</i>       | F: CCTGAACAGCGAAGTGTTGG<br>R: TGGAGAACCCATGAGGTTTCAA         | qPCR               |
| pri-miR-214       | F: TCTGCCTGTCTACACTTGCTG<br>R: TGACTIONCCTGTCTGTGCCT         | qPCR               |
| pre-miR-214       | F: CTGGCTGGACAGAGTTG<br>R: TACAGGTGAG CGGATGTT               | qPCR               |
| <i>36B4</i>       | F: GAAACTGCTGCCTCACATCCG<br>R: GCTGGCACAGTGACCTCACACG        | qPCR               |
| 45S rRNA          | F: GTGCCCTCACGTGTTTCACTTT<br>R: TAGGAGACAAACCTGGAACGCT       | qPCR               |
| 12S rRNA          | F: TCGATAAACCCCGCTCTACCT<br>R: TGGCTACACCTTGACCTAACGTT       | qPCR               |
| si1-4833411C07Rik | F: CCGGUGUCUCUAAUGACAGUCAUCA<br>R: UGAUGACUGUCAUAGAGACACCGG  | siRNA              |
| si2-4833411C07Rik | F: CAGCUACUGGUGAAGGUCACAGUUU<br>R: AAACUGUGACCUUCACCAGUAGCUG | siRNA              |
| si1-Gm10768       | F: GAGGUUCUCAGAGGGAGAGAGUAUA<br>R: UAUACUCUCUCCUCUGAGAACCUC  | siRNA              |
| si2-Gm10768       | F: UGGCGGUGACCAGUUGCAUUGGUUA<br>R: UAACCAAUGCAACUGGUCACCGCCA | siRNA              |
| 5'-RACE           | F: AATGGCCAGGTAAATGAGGAAC<br>R: TGTGCCCTGAAGCTGCCTGAAC       | RACE               |

|                          |                                                        |                |
|--------------------------|--------------------------------------------------------|----------------|
| 3'-RACE                  | F: CAGGGGAGGACATTTGAAGATT<br>R: CGCGTTTCTAGATACACAACAT | RACE           |
| Full length<br>(Gm10768) | F: TGTTAGGGTGCTTGCCTTGA<br>R: TATTCGGGGAAAGCCAGAGC     | RACE           |
| pri-miR-214              | F: TTTTTCATGGGCAAGGCTAT<br>R: GCCAAATGGTTTTGTCGAAT     | Sequence clone |

---

## References

1. Kong, L., Zhang, Y., Ye, Z. Q., Liu, X. Q., Zhao, S. Q., Wei, L., and Gao, G. (2007) CPC: assess the protein-coding potential of transcripts using sequence features and support vector machine. *Nucleic acids research* **35**, W345-349
2. Wang, L., Park, H. J., Dasari, S., Wang, S., Kocher, J. P., and Li, W. (2013) CPAT: Coding-Potential Assessment Tool using an alignment-free logistic regression model. *Nucleic acids research* **41**, e74
3. Li, P., Ruan, X., Yang, L., Kieseewetter, K., Zhao, Y., Luo, H., Chen, Y., Gucek, M., Zhu, J., and Cao, H. (2015) A Liver-Enriched Long Non-Coding RNA, lncLSTR, Regulates Systemic Lipid Metabolism in Mice. *Cell metabolism* **21**, 455-467
4. Yang, L., Li, P., Yang, W., Ruan, X., Kieseewetter, K., Zhu, J., and Cao, H. (2016) Integrative Transcriptome Analyses of Metabolic Responses in Mice Define Pivotal LncRNA Metabolic Regulators. *Cell metabolism* **24**, 627-639
